# Supplementary material
Source: PubMed Central journal article supplement (PMC5590971)
Supplement: mmc1.pdf [file mmc1.pdf]

**The American Journal of Human Genetics, Volume 101**

**Supplemental Data**

**A Scalable Bayesian Method for Integrating  
Functional Information  
in Genome-wide Association Studies**

**Jingjing Yang, Lars G. Fritsche, Xiang Zhou, Gonçalo Abecasis, and International Age-Related Macular Degeneration Genomics Consortium**

# Supplemental Data

## Supplemental Note

Technical Details about bfGWAS

## Supplemental Figures

Figure S1: Flowcharts of bfGWAS.

Figure S2: Plots of the potential scale reduction factors (PSRF).

Figure S3: Prioritization ranks of the true causal SNP1 (pink) and SNP2 (cyan).

Figure S4: Estimates of the log-relative-risk  $\ln(\pi_0/\pi_1)$  by bfGWAS and the enrich-parameter by fGWAS, along with 95% confidence intervals.

Figure S5: Estimates of the log-ratio of effect-size variances  $\ln(\sigma_0^2/\sigma_1^2)$  by bfGWAS, along with 95% confidence intervals.

Figure S6: Sorted top bfGWAS PPs versus sorted top  $-\log_{10}(\text{P-values})$  of single variant tests.

Figure S7: Manhattan plot highlighting AMD GWAS signals with BVS PP  $>0.1068$ .

Figure S8: Manhattan plots highlighting AMD GWAS signals by accounting for gene-based annotations.

Figure S9: ZoomLocus plots of region *CHR19:6218146-7218146*.

Figure S10: Enrichment analysis results with varying prior means as well as starting values ( $10^{-6}, 5 \times 10^{-6}, 10^{-5}$ ) for  $\pi_q$ , and varying starting values (10, 5, 1) for  $\sigma_q^2$ .

Figure S11: fGWAS enrichment estimates with 95% error bars.

Figure S12: Ratios of enrich parameters versus the respective genome-wide averages, along with 95% confidence intervals.

Figure S13: Enrichment analysis results for the AMD GWAS data with chromatin states profiled with respect to the epigenome of fetal thymus (E093).

Figure S14: Manhattan plot highlighting MGI GWAS signals of skin cancer with BVS PP  $>0.1068$ .

Figure S15: Manhattan plots highlighting MGI GWAS signals of skin cancer by accounting for gene-based annotations.

Figure S16: Enrichment analysis results of the MGI GWAS of skin cancer, accounting for gene-based annotations.

Figure S17: LocusZoom plots of region of *CHR16:89686117-90172696*.

## Supplemental Tables

Table S1: Classification of gene-based functional annotations.

Table S2: Compare results by P-value, fGWAS, and bfGWAS in the 34 known AMD loci, accounting for gene-based functional annotations.

Table S3: AMD risk variants identified by bfGWAS in the 34 known loci, accounting for gene-based annotations.

Table S4: AMD risk variants by fGWAS in the 34 known loci, accounting for gene-based annotations.

Table S5: Candidate AMD loci identified by bfGWAS, accounting for gene-based annotations.

Table S6: Candidate AMD loci identified by fGWAS, accounting for gene-based annotations.

Table S7: AMD risk variants by bfGWAS in the 34 known loci, accounting for summarized regulatory annotations.

Table S8: AMD risk variants by fGWAS in the 34 known loci, accounting for summarized regulatory annotations.

Table S9: Candidate AMD loci identified by bfGWAS, accounting for summarized regulatory annotations.

Table S10: Candidate AMD loci identified by fGWAS, accounting for summarized regulatory annotations.

Table S11: AMD risk variants by bfGWAS in the 34 known loci, accounting for chromatin states profiled with the epigenome of fetal thymus.

Table S12: AMD risk variants by fGWAS in the 34 known loci, accounting for chromatin states profiled with the epigenome of fetal thymus.

Table S13: Candidate AMD loci identified by bfGWAS, accounting for chromatin states profiled with the epigenome of fetal thymus.

Table S14: Candidate AMD loci identified by fGWAS, accounting for chromatin states profiled with the epigenome of fetal thymus.

Table S15: Haplotype analysis in locus C2/CFB/SKIV2L.

Table S16: Model comparison.

## Supplemental References

# Supplemental Note

## Technical Details about bfgWAS

### 1 Bayesian Hierarchical Model

#### 1.1 Standard Bayesian Variable Selection Regression Model

Consider the following standard Bayesian variable selection regression (BVSR) model

$$\mathbf{y}_{n \times 1} = \mathbf{X}_{n \times p} \boldsymbol{\beta}_{p \times 1} + \boldsymbol{\epsilon}_{n \times 1}, \beta_i \sim \pi_i N(0, \tau^{-1} \sigma_i^2) + (1 - \pi_i) \delta_0(\beta_i), \epsilon_i \sim N(0, \tau^{-1}), \quad (1)$$

where  $\mathbf{y}_{n \times 1}$  denotes the centered phenotype vector of  $n$  samples;  $\mathbf{X}_{n \times p}$  denotes the centered genotype matrix of  $p$  genetic variants;  $\epsilon_i$  denotes the residual error independently and identically distributed (i.i.d.) with normal distribution  $N(0, \tau^{-1})$ ; and  $\beta_i$  follows a spike-and-slab prior distribution [5, 6, 7] — that is,  $\beta_i$  follows the normal distribution  $N(0, \tau^{-1} \sigma_i^2)$  with probability  $\pi_i$  and the point-mass density function  $\delta_0(\cdot)$  at 0 with probability  $(1 - \pi_i)$  ( $\delta_0(\beta_i) = 1$  if  $\beta_i = 0$ , otherwise  $\delta_0(\beta_i) = 0$ ).

Here, the genotype matrix contains either dosage data within range  $[0, 2]$  or genotype data with values  $\{0, 1, 2\}$  denoting the number of minor alleles. The assumption of the spike-and-slab prior for  $\beta_i$  enforces variable selection in the regression model (1). We drop the intercept term here for assuming both  $\mathbf{y}_{n \times 1}$  and columns of  $\mathbf{X}_{n \times p}$  are centered. Although this model is developed for quantitative trait, we can treat dichotomous traits (e.g., cases and controls) as quantitative with values of 1 and 0 (e.g., 1 for cases and 0 for controls), which was proven to be equivalent as using the logistic or probit model by previous approaches [6, 7].

#### 1.2 Integrating Functional Information

In this paper, we only consider non-overlapped categorical annotations. Let  $\mathbf{A}_i = (A_{i1}, \dots, A_{iQ})^T$  denotes the vector of  $Q$  annotations for the  $i$ th variant, where  $A_{iq}$  takes binary values (1/0) to denote whether the  $i$ th variant is of the  $q$ th annotation. In order to integrate functional annotations into the standard BVSR model (1), we assume all variants

of annotation  $q$  have the same spike-and-slab prior with parameters  $(\pi_q, \sigma_q^2)$ . We further assume the following independent and conjugate hyper priors (Figure S 1(A)):

$$\pi_q \text{ i.i.d. } \sim \text{Beta}(a_q, b_q), \sigma_q^2 \text{ i.i.d. } \sim \text{IG}(k_1, k_2), \tau \sim G(k_3, k_4), \quad (2)$$

where  $\text{Beta}(a_q, b_q)$  denotes a Beta distribution with positive shape parameters  $a_q$  and  $b_q$ ,  $\text{IG}(k_1, k_2)$  denotes an Inverse-Gamma distribution with shape parameter  $k_1$  and scale parameter  $k_2$ , and  $G(k_3, k_4)$  denotes a Gamma distribution with shape parameter  $k_3$  and scale parameter  $k_4$  (Figure S1(A)). Note that parameters  $(a_q, b_q)$  could be different with respect to different annotations. This hierarchical BVS model is equivalent to the standard BVS model when modeling no functional information (i.e., assuming the same  $\pi_q$  and  $\sigma_q^2$  for all variants).

In order to adjust for the unbalance distribution of functional annotations among all variants and encourage for a sparse model, we choose values for  $a_q$  and  $b_q$  such that the mean of the Beta distribution  $\frac{a_q}{a_q+b_q} = 10^{-6}$  with  $(a_q + b_q) = m_q = \sum_{i=1, j=q}^p A_{ij}$  (the total number of variants of annotation  $q$ ). Here, the mean  $10^{-6}$  of  $\text{Beta}(a_q, b_q)$  helps enforce a sparse initial model that is desired for controlling false positives (assuming one signal per 1M variants). We take  $k_1 = k_2 = k_3 = k_4 = 0.1$  to induce non-informative priors on  $\sigma_q^2$  and  $\tau$ . Thus, the posterior estimates of  $\pi_q$  and  $\sigma_q^2$  will mainly depend on the data likelihood. However, when there are few association signals in the  $q$ th category, the posterior estimates of  $\pi_q$  and  $\sigma_q^2$  will be set as their respective prior modes. Note that although the hyper priors are assumed to be independent, the posterior distributions of  $\pi_q$  and  $\sigma_q^2$  are no longer independent.

### 1.3 Latent Indicator Variable

To facilitate computation, we introduce a latent indicator vector  $\gamma_{p \times 1}$  [5] into the model, where each element  $\gamma_i \in \{0, 1\}$  indicates whether the corresponding  $i$ th effect  $\beta_i$  equals to 0 with  $\gamma_i = 0$  or follows the  $N(0, \tau^{-1}\sigma_i^2)$  distribution with  $\gamma_i = 1$ . Equivalently,

$$\gamma_i \sim \text{Bernoulli}(\pi_i), \beta_{-\gamma} \sim \delta_0(\cdot), \beta_{\gamma} \sim \text{MVN}_{|\gamma|}(0, \tau^{-1}\mathbf{V}_{\gamma}),$$

where  $|\gamma|$  denotes the number of non-zero entries in  $\gamma$ ;  $\beta_{-\gamma}$  denotes the sub-vector of  $\beta_{p \times 1}$  corresponding to variants with  $\gamma_i = 0$ ;  $\beta_{\gamma}$  denotes the sub-vector of  $\beta_{p \times 1}$  corresponding to the variants with  $\{\gamma_j = 1; j = 1, \dots, |\gamma|\}$ ; and  $\mathbf{V}_{|\gamma|}$  is the corresponding sub-matrix (with  $\gamma_j = 1$ ) of  $\mathbf{V}_{p \times p} = \text{diag}(\sigma_1^2, \dots, \sigma_p^2)$ .

## 1.4 Bayesian Inference

With the above Bayesian hierarchical model, the posterior joint distribution of  $(\beta, \gamma, \sigma^2, \pi, \tau)$  is proportional to the product of likelihood and prior density functions,

$$P(\beta, \gamma, \sigma^2, \pi, \tau | \mathbf{y}, \mathbf{X}, \mathbf{A}) \propto P(\mathbf{y} | \mathbf{X}, \beta, \gamma, \tau) P(\beta | \mathbf{A}, \pi, \sigma^2, \tau) P(\gamma | \pi) P(\pi) P(\sigma^2) P(\tau), \quad (3)$$

where  $\pi = (\pi_1, \dots, \pi_Q)$ ,  $\sigma^2 = (\sigma_1^2, \dots, \sigma_Q^2)$ , and  $\mathbf{A}$  is the  $p \times Q$  annotation matrix with binary values.

Now our goal is to make inference on the category-specific parameters  $(\pi, \sigma^2)$  and the variable-specific parameters  $(\beta, E[\gamma])$  from their respective marginal posterior distributions, conditioning on the data  $(\mathbf{y}, \mathbf{X}, \mathbf{A})$ . The category-specific parameters  $(\pi, \sigma^2)$  denote the shared characteristics of variants with the same annotation, which are also referred as enrichment parameters in this paper. Specifically,  $\pi_q$  denotes the causality for variants of annotation  $q$ , and  $\sigma_q^2$  denotes the effect-size variance for associated variants (with nonzero  $\beta_j$ ) of annotation  $q$ .

To make the Bayesian inference of our model applicable for genome-wide analysis, we pair it with a novel Expectation-Maximization Markov chain Monte Carlo (EM-MCMC) algorithm. Because of the block-wise linkage disequilibrium (LD) structure of human genome, we can segment the genotype data  $\mathbf{X}$  into  $K$  approximately independent blocks, i.e.,  $\mathbf{X} = \{\mathbf{X}_1, \mathbf{X}_2, \dots, \mathbf{X}_K\}$ , where each submatrix  $\mathbf{X}_k$  has dimension  $n \times p_k$  (genotypes of  $p_k$  variants for  $n$  samples). Thus, we can write the likelihood function in (3) as a product of a series likelihood functions for  $\mathbf{X}_k$ ,

$$P(\mathbf{y} | \mathbf{X}, \beta, \gamma, \tau) = \prod_{k=1}^K P_k(\mathbf{y} | \mathbf{X}_k, \beta_k, \gamma_k, \tau), \quad (4)$$

where  $(\mathbf{y} | \mathbf{X}_k, \beta_k, \gamma_k, \tau) \sim MVN_{|\gamma_k|}(\mathbf{X}_k \beta_k, \tau^{-1} \mathbf{I}_{|\gamma_k|})$ .

To avoid adjusting for the residual variance with respect to each genome-block, we fix  $\tau^{-1}$  as the phenotype variance. This assumption is reasonable because most genome-blocks explain little phenotype variance in practice. Although fixing  $\tau^{-1}$  as the phenotype variance seems conservative for genome-blocks with true signals, our analysis showed that it barely affect identifying true signals.

In the Expectation step (E-step),  $(\beta_k, E[\gamma_k])$  are estimated by implementing MCMC per block, conditioning on the given values of  $(\pi, \sigma)$ ; in the Maximization step (M-step),  $(\pi, \sigma)$  are updated, conditioning on genome-wide estimates of  $(\beta, E[\gamma])$  from the E-step. In general,  $\sim 5$  EM iterations will lead to convergent estimates of  $(\pi, \sigma)$ , and the estimates of  $(\beta_k, E[\gamma_k])$  from the last E-step will be used to identify association signals (details are provided in Section 2; Figure S 1(B)).

### 1.4.1 Conditional Posterior Distribution for $\beta_k$

Conditioning on the values of  $(\boldsymbol{\pi}, \boldsymbol{\sigma}^2, \tau)$ , the posterior distribution for the variant-specific parameters  $(\beta_k, \gamma_k)$  of block  $k$  is

$$P(\beta_k, \gamma_k | \mathbf{X}_k, \mathbf{y}, \boldsymbol{\pi}, \boldsymbol{\sigma}^2, \tau) \propto P(\mathbf{y} | \mathbf{X}_k, \beta_k, \gamma_k, \tau) P(\beta_k | \gamma_k, \boldsymbol{\sigma}^2, \tau) P(\gamma_k | \boldsymbol{\pi}). \quad (5)$$

Conditioning on the indicator vector  $\gamma_k$ , the effect-sizes associated with zero indicator variables are 0, while the posterior distribution for  $\beta_{|\gamma_k|}$  is given by

$$\begin{aligned} P(\beta_{|\gamma_k|} | \mathbf{X}_{|\gamma_k|}, \mathbf{y}, \gamma_k, \boldsymbol{\sigma}^2, \tau) &\propto P_k(\mathbf{y} | \mathbf{X}_{|\gamma_k|}, \beta_{|\gamma_k|}, \gamma_k, \tau) P(\beta_{|\gamma_k|} | \gamma_k, \boldsymbol{\sigma}^2, \tau) \\ &\propto \exp \left\{ -\frac{\tau}{2} (\mathbf{y} - \mathbf{X}_{|\gamma_k|} \beta_{|\gamma_k|})^T (\mathbf{y} - \mathbf{X}_{|\gamma_k|} \beta_{|\gamma_k|}) \right\} \exp \left\{ -\frac{\tau}{2} \beta_{|\gamma_k|}^T \mathbf{V}_{|\gamma_k|}^{-1} \beta_{|\gamma_k|} \right\} \\ &\propto \exp \left\{ -\frac{\tau}{2} \left( \beta_{|\gamma_k|}^T \mathbf{X}_{|\gamma_k|}^T \mathbf{X}_{|\gamma_k|} \beta_{|\gamma_k|} - 2 \beta_{|\gamma_k|}^T \mathbf{X}_{|\gamma_k|} \mathbf{y} + \beta_{|\gamma_k|}^T \mathbf{V}_{|\gamma_k|}^{-1} \beta_{|\gamma_k|} \right) \right\} \\ &\propto \exp \left\{ -\frac{\tau}{2} \left( \beta_{|\gamma_k|}^T (\mathbf{X}_{|\gamma_k|}^T \mathbf{X}_{|\gamma_k|} + \mathbf{V}_{|\gamma_k|}^{-1}) \beta_{|\gamma_k|} - 2 \beta_{|\gamma_k|}^T \mathbf{X}_{|\gamma_k|}^T \mathbf{y} \right) \right\}. \end{aligned} \quad (6)$$

From (6), it is easy to see that

$$\begin{aligned} &(\beta_{|\gamma_k|} | \mathbf{X}_{|\gamma_k|}, \mathbf{y}, \gamma_k, \boldsymbol{\sigma}^2, \tau) \sim \\ &MVN_{|\gamma_k|} \left( (\mathbf{X}_{|\gamma_k|}^T \mathbf{X}_{|\gamma_k|} + \mathbf{V}_{|\gamma_k|}^{-1})^{-1} \mathbf{X}_{|\gamma_k|}^T \mathbf{y}, \tau^{-1} (\mathbf{X}_{|\gamma_k|}^T \mathbf{X}_{|\gamma_k|} + \mathbf{V}_{|\gamma_k|}^{-1})^{-1} \right). \end{aligned} \quad (7)$$

Here, the subscript  $|\gamma_k|$  indicates sub-matrices or sub-vectors corresponding to variants with nonzero indicator variables, and  $\mathbf{V}_{|\gamma_k|}$  is a diagonal matrix with  $(\mathbf{V}_{|\gamma_k|})_{jj} = \sigma_q^2$  if the  $j$ th variant is of annotation  $q$ .

### 1.4.2 Conditional Posterior Distribution for $\gamma_k$

Because of the conditional conjugate prior for  $\beta_k$ , we can easily integrate  $\beta_k$  out from the joint conditional posterior distribution (5) to obtain the marginal conditional posterior distribution for  $\gamma_k$ ,

$$\begin{aligned} P(\gamma_k | \mathbf{X}_k, \mathbf{y}, \boldsymbol{\pi}, \boldsymbol{\sigma}^2, \tau) &\propto \int_{\beta_k} P_k(\mathbf{y} | \mathbf{X}_k, \beta_k, \gamma_k, \tau) P(\beta_k | \gamma_k, \boldsymbol{\sigma}^2, \tau) P(\gamma_k | \boldsymbol{\pi}) d\beta_k \\ &\propto |\boldsymbol{\Omega}_{|\gamma_k|}|^{-1/2} \exp \left\{ \frac{\tau}{2} \mathbf{y}^T \mathbf{X}_{|\gamma_k|} \mathbf{V}_{|\gamma_k|} \boldsymbol{\Omega}_{|\gamma_k|}^{-1} \mathbf{X}_{|\gamma_k|}^T \mathbf{y} \right\} P(\gamma_k | \boldsymbol{\pi}), \end{aligned} \quad (8)$$

where  $\boldsymbol{\Omega}_{|\gamma_k|} = \mathbf{V}_{|\gamma_k|} \mathbf{X}_{|\gamma_k|}^T \mathbf{X}_{|\gamma_k|} + \mathbf{I}_{|\gamma_k|}$ .

## 2 EM-MCMC Algorithm

The steps of the EM-MCMC algorithm are as follows:

- (i) Fix  $\tau$  at the value of phenotype variance;
- (ii) Set initial values for the category-specific parameters  $(\pi, \sigma^2)$ ;
- (iii) E-step: Conditioning on the most recent values of  $(\pi, \sigma^2)$ , estimate variant-specific parameters  $(\beta, E[\gamma])$  by implementing MCMC per block;
- (iv) M-step: Conditioning on the genome-wide estimates of  $(\beta, E[\gamma])$  from the previous E-step, update  $(\pi, \sigma^2)$  by their MAPs (maximum a posteriori estimates), maximizing the expected log-posterior-likelihood functions [2];
- (v) Repeat the EM-steps (iii) and (iv) for a few times until the MAPs of  $(\pi, \sigma^2)$  converge.

## 2.1 Setup Initial Values

In this paper, we fix  $\tau$  at the value of phenotype variance, equivalent to assuming no phenotype variance explained by the genetic variants. This assumption is true for most blocks and slightly conservative for blocks with true signals. However, our analysis showed that this assumption barely affects identifying true signals. We take initial values  $\pi_q = 1 \times 10^{-6}$  to initial a sparse and conservative model, and  $\sigma_q^2 = 10$  to start with a large effect-size variance for all associated variants.

## 2.2 MCMC Sampling Scheme

The MCMC sampling is implemented per block for estimating  $(\beta_k, E[\gamma_k])$ , conditioning on category-specific parameters  $(\pi, \sigma^2)$ :

- (i) First, sort all variants in the block by their base positions, perform single variant tests, and rank variants based on their marginal association evidence (e.g., P-values) from strong to weak.
- (ii) Second, select an initial model with independent significant signals. We first include the variant with the smallest P-value into the model (i.e., set the corresponding indicator value as 1). Then, conditioning on the currently selected variant(s), select the next most significant variant with P-value  $< 5 \times 10^{-8}$ . Stop selection when no other independent genome-wide signal exists. Generally, most of the blocks with  $\sim 10K$  variants will start with only one variant.
- (iii) Third, repeat the MCMC sampling for a large number of iterations (e.g., 50K iterations with 50K burnins), in which the Metropolis-Hastings algorithm is used



to draw posterior samples for  $\gamma_k$  based on (8). With indicator vector  $\gamma'_k$  and corresponding effect-size vector  $\beta_{|\gamma'_k|}$  from previous iteration, each MCMC iteration is as follows:

(a) Randomly propose a new indicator vector  $\gamma''_k$  by:

- \* Including an extra variant into the model with probability 1/3: generate a rank  $r$  from a proposal distribution  $P_{\gamma_k}$  such that the variant with rank  $r$  is not included in the current model (change the corresponding indicator variable from 0 to 1). Here,  $P_{\gamma_k}$  is constructed as the mixture distribution  $0.9*U_{top} + 0.1U_{rest}$ , where  $U_{top}$  denotes the uniform distribution on top ranks  $(1, \dots, t_k)$  and  $U_{rest}$  denotes the uniform distribution on the remain ranks  $(t_{k+1}, \dots, p_k)$  ( $t_k$  is an arbitrary number). That is, we assume a variant whose P-value is ranked in the top association group will be proposed with probability  $0.9/(t_k)$ , while a variant in the remaining group will be proposed with probability  $0.1/(p_k - t_k)$ . A rank will keep being proposed from  $P_{\gamma_k}$  until the corresponding variant is absent in the current model. We take  $t_k = \min(p_k, 300)$  in our software.
- \* Deleting a variant from the current model with probability 1/3: randomly delete a variant from the current model (change the corresponding indicator variable from 1 to 0), i.e., each variant in the current model has probability  $1/|\gamma'_k|$  to be deleted.
- \* Switching a variant in the current model with an un-included variant in the neighborhood of the switch candidate (switch the corresponding indicator variable values): randomly select a variant in the current model as a switch candidate; propose a variant within its neighborhood from the proposal distribution  $P_{neib}$ . In order to improve the MCMC mixing property, we calibrate  $P_{neib}$  based on the conditional association evidence of all un-included variants in the neighborhood, conditioning on all variants in the current model except the switch candidate. For example, if there are 20 un-included variants in the neighborhood with conditional likelihood ratio test (LRT) statistic values  $\{s_1, \dots, s_{20}\}$ , we first subtract the largest statistic value  $s_{max}$  from all values, then take  $P_{neib}(s_j) = \exp(s_j - s_{max}) / \sum_{b=1}^{20} \exp(s_b - s_{max})$  as the probability for the corresponding  $j$ th variant to be proposed. The neighborhood size can be tuned by users (we set the neighborhood window as 100 variants near the switch candidate in our analyses).

- (b) Conditioning on the indicator vector  $\gamma''_k$ , the effect-size vector  $\beta_{|\gamma''_k|}$  is estimated by its conditional posterior mean in (7).
- (c) Calculate the Metropolis-Hastings acceptance ratio, and then decide whether to accept or reject  $\gamma''_k$  by the Metropolis-Hastings algorithm.
- (iv) Finally,  $E[\gamma_{kj}]$  is estimated by  $u_{kj}/M$ , where  $u_{kj}$  is the number of times when the  $j$ th variant in block  $k$  is included into the model and  $M$  is the total MCMC iterations. Note that  $E[\gamma_{kj}]$  is also referred as the Bayesian posterior inclusion probability (PP), evidence for the  $i$ th variant in block  $k$  to be an association signal. The Bayesian estimate of the corresponding  $\beta_{kj}$  is given by the posterior mean  $\sum_{l=1}^{u_{kj}} \beta_{kjl}/u_{kj}$ , where  $\beta_{kjl}$  is the effect-size estimate for the  $j$ th variant (in block  $k$ ) when it is included into the model for the  $l$ th time.

Within the MCMC sampling, we also record the number of iterations  $M_{active}$  when the linear regression model includes at least one variant by the Metropolis-Hastings algorithm. Then the proportion of such MCMC iterations  $M_{active}/M$  gives us the regional posterior inclusion probability (regional-PP) of the study block, which is the probability of existing at least one signal in the block. Because variants in high LD and the same annotation category have the same chance to be included into the linear model (splitting the posterior probability for a single signal), the regional-PP is more appropriate than the single variant Bayesian PP for claiming a risk locus.

## 2.3 EM Algorithm

In the EM algorithm, values of  $(\pi, \sigma^2)$  are updated by their respective maximum a posteriori estimates (MAPs), maximizing expected log-posterior-likelihood functions. With the Bayesian estimates of  $(\beta, E[\gamma])$  from the E-step, the expected log-posterior-likelihood functions and MAPs can be derived with closed-form expressions.

### 2.3.1 MAP for $\sigma^2$

From the joint posterior distribution (3), the conditional posterior density function (posterior likelihood) of  $\sigma^2$  becomes

$$P(\sigma^2 | \beta, \gamma, \tau) \propto P(\beta | \gamma, \sigma^2, \tau) P(\sigma^2), \quad (9)$$

where  $P(\sigma^2) = \prod_{q=1}^Q P(\sigma_q^2)$  with  $\sigma_q^2 \sim IG(k_1, k_2)$ , i.e.  $P(\sigma_q^2) \propto (\sigma_q^2)^{-(k_1+1)} \exp\left(-\frac{k_2}{\sigma_q^2}\right)$ ;  $P(\beta | \gamma, \sigma^2, \tau) = \prod_{i=1}^p P(\beta_i | \sigma_i^2, \gamma_i, \tau)$  with  $P(\beta_i | \sigma_i^2, \gamma_i, \tau) =$

$(\gamma_i N(\beta_i; 0, \tau^{-1}\sigma_i^2) + (1 - \gamma_i)\delta_0(\beta_i))$ ; and  $\sigma_i^2 = \sigma_q^2$  if the  $i$ th variant is of annotation  $q$ .

The expected log-posterior-likelihood of  $\sigma^2$  is given by

$$\begin{aligned}
l(\sigma^2) &= E_\gamma [l_n(P(\sigma^2|\beta, \gamma, \tau))] \\
&= E_\gamma \left[ \sum_{i=1}^p \ln(P(\beta_i|\sigma_i^2, \gamma_i, \tau)) \right] + \sum_{q=1}^Q \ln(P(\sigma_q^2)) + C \\
&= \sum_{i=1}^p E_\gamma [l_n(P(\beta_i|\sigma_i^2, \gamma_i, \tau))] + \sum_{q=1}^Q \ln(P(\sigma_q^2)) + C \\
&\approx \sum_{i=1}^p [\widehat{\gamma}_i \ln(P(\beta_i|\gamma_i = 1, \sigma_i^2)) + (1 - \widehat{\gamma}_i) \ln(P(\beta_i|\gamma_i = 0))] + \\
&\quad \sum_{q=1}^Q \left[ (k_1 + 1) \ln\left(\frac{1}{\sigma_q^2}\right) - k_2 \frac{1}{\sigma_q^2} \right] + C \\
&= \sum_{i=1}^p \left[ \widehat{\gamma}_i \left( \frac{1}{2} \ln\left(\frac{\tau}{\sigma_i^2}\right) - \frac{\tau \widehat{\beta}_i^2}{2\sigma_i^2} \right) \right] + \sum_{q=1}^Q \left[ (k_1 + 1) \ln\left(\frac{1}{\sigma_q^2}\right) - k_2 \frac{1}{\sigma_q^2} \right] + C, \quad (10)
\end{aligned}$$

where  $\{\widehat{\gamma}_i = E[\gamma_i]\}$ ,  $\{\widehat{\beta}_i\}$  are Bayesian estimates by MCMC in the E-step, and  $C$  is a constant free of  $\sigma^2$ .

From (10), we can see that the posterior distributions of  $\{\sigma_q^2; q = 1, \dots, Q\}$  are disjoint, because of independent priors and non-overlapped annotations. Thus, the expected log-posterior-likelihood function for each  $\sigma_q^2$  is

$$l_{\sigma_q^2} = \sum_{j_q=1}^{m_q} \left[ \widehat{\gamma}_{j_q} \left( \frac{1}{2} \ln\left(\frac{\tau}{\sigma_q^2}\right) - \frac{\tau \widehat{\beta}_{j_q}^2}{2\sigma_q^2} \right) \right] + (k_1 + 1) \ln\left(\frac{1}{\sigma_q^2}\right) - \frac{k_2}{\sigma_q^2} + C, \quad (11)$$

where  $\{\widehat{\gamma}_{j_q}, \widehat{\beta}_{j_q}; j_q = 1, \dots, n_q\}$  are the Bayesian estimates for variants of annotation  $q$ , and  $m_q$  is the total number of variants with annotation  $q$ . The MAP of  $\sigma_q^2$  can be solved from

$$\frac{dl_{\sigma_q^2}}{d(1/\sigma_q^2)} = \sum_{j_q=1}^{m_q} \left[ \widehat{\gamma}_{j_q} \frac{\sigma_q^2}{2} - \widehat{\gamma}_{j_q} \frac{\tau \widehat{\beta}_{j_q}^2}{2} \right] + (k_1 + 1) \sigma_q^2 - k_2 = 0,$$

which is

$$\widehat{\sigma}_q^2 = \frac{\tau \sum_{j_q=1}^{m_q} (\widehat{\gamma}_{j_q} \widehat{\beta}_{j_q}^2) + 2k_2}{\sum_{j_q=1}^{m_q} \widehat{\gamma}_{j_q} + 2(k_1 + 1)}.$$

### 2.3.2 MAP for $\pi$

From the joint posterior distribution (3), the conditional posterior density function (posterior likelihood) of  $\pi$  becomes

$$P(\boldsymbol{\pi}|\boldsymbol{\gamma}) \propto P(\boldsymbol{\gamma}|\boldsymbol{\pi})P(\boldsymbol{\pi}), \quad (12)$$

where  $P(\boldsymbol{\gamma}|\boldsymbol{\pi}) = \prod_{i=1}^p P(\gamma_i|\pi_i) \propto \prod_{i=1}^p \pi_i^{\gamma_i}(1 - \pi_i)^{1-\gamma_i}$ ;  $\pi_i = \pi_q$  if the  $i$ th variant is of annotation  $q$ ; and  $P(\boldsymbol{\pi}) = \prod_{q=1}^Q P(\pi_q)$  with  $\pi_q$  i.i.d.  $\sim \text{Beta}(a_q, b_q)$ .

The expected log-posterior-likelihood of  $\pi$  can be derived as

$$\begin{aligned} l(\boldsymbol{\pi}) &= E_{\boldsymbol{\gamma}} [l \ln(P(\boldsymbol{\pi}|\boldsymbol{\gamma}))] \\ &= E_{\boldsymbol{\gamma}} \left[ \sum_{i=1}^p \ln(P(\gamma_i|\pi_i)) \right] + \ln(P(\boldsymbol{\pi})) + C \\ &= \sum_{i=1}^p E_{\boldsymbol{\gamma}} [\ln(P(\gamma_i|\pi_i))] + \ln(P(\boldsymbol{\pi})) + C \\ &= \sum_{i=1}^p (\text{Prob}(\gamma_i = 1)\ln(\pi_i) + \text{Prob}(\gamma_i = 0)\ln(1 - \pi_i)) + \\ &\quad \sum_{q=1}^Q ((a_q - 1)\ln(\pi_q) + (b_q - 1)\ln(1 - \pi_q)) + C \\ &\approx \sum_{i=1}^p (\widehat{\gamma}_i \ln(\pi_i) + (1 - \widehat{\gamma}_i)\ln(1 - \pi_i)) + \sum_{q=1}^Q ((a_q - 1)\ln(\pi_q) + (b_q - 1)\ln(1 - \pi_q)) + C, \end{aligned} \quad (13)$$

where  $\{\widehat{\gamma}_i = E[\gamma_i]\}$  are estimated by MCMC, and  $C$  is a constant free of  $\pi$ .

Similarly, because the posterior distributions of  $\{\pi_q; q = 1, \dots, Q\}$  are also disjoint, the expected log-posterior-likelihood function for  $\pi_q$  is given by

$$l_{\pi_q} = \sum_{j_q=1}^{m_q} [\widehat{\gamma}_{j_q} \ln(\pi_q) + (1 - \widehat{\gamma}_{j_q})\ln(1 - \pi_q)] + (a_q - 1)\ln(\pi_q) + (b_q - 1)\ln(1 - \pi_q) + C, \quad (14)$$

and the MAP for  $\pi_q$  is solved as

$$\widehat{\pi}_q = \frac{\sum_{j_q=1}^{m_q} \widehat{\gamma}_{j_q} + a_q - 1}{m_q + a_q + b_q - 2}.$$

### 3 Construct Confidence Intervals by Fisher Information

Fisher information of  $(\pi, \sigma^2)$  can be derived from the second derivatives of the respective expected log-posterior-likelihood functions as in (11) and (13). By the asymptotic-normality of MAP, as  $n \rightarrow \infty$ , the distribution of a MAP estimate  $\hat{\theta}$  converges to a multivariate normal (MVN) distribution with mean equal to the true parameter value  $\theta_0$  and covariance matrix equal to the inverse of the Fisher information.

Therefore, the MAPs  $\hat{\sigma}^2$  and  $\hat{\pi}$  are converging to the following MVN distributions as  $n \rightarrow \infty$ ,

$$\hat{\sigma}^2 \rightarrow MVN(\sigma_*^2, \mathbf{I}_{\sigma^2}(\hat{\sigma}^2)^{-1}), \quad \hat{\pi} \rightarrow MVN(\pi_*, \mathbf{I}_{\pi}(\hat{\pi})^{-1}), \quad (15)$$

where  $\sigma_*^2$  and  $\pi_*$  are the true parameter values;  $\mathbf{I}_{\sigma^2}(\hat{\sigma}^2) \approx -\frac{\partial^2 l(\sigma^2)}{\partial \sigma^2 (\partial \sigma^2)^T} |_{\hat{\sigma}^2}$ ; and  $\mathbf{I}_{\pi}(\hat{\pi}) \approx -\frac{\partial^2 l(\pi)}{\partial \pi \partial \pi^T} |_{\hat{\pi}}$ . Because of the mutual independence among  $\{\sigma_q^2, \pi_q; q = 1, \dots, Q\}$  (conditioning on the estimates of  $\beta$  and  $E[\gamma]$ ), the analytical forms for the second derivatives of  $l_{\sigma_q^2}, l_{\pi_q}$  are

$$\begin{aligned} \frac{dl_{\sigma_q^2}}{d^2 \sigma_q^2} &= \sum_{j_q=1}^{m_q} \left( \frac{\hat{\gamma}_{j_q}}{2(\sigma^2)^2} - \frac{\hat{\gamma}_{j_q} \tau \hat{\beta}_{j_q}^2}{(\sigma^2)^3} \right) + \frac{k_1 + 1}{(\sigma^2)^2} - \frac{2k_2}{(\sigma^2)^3}, \\ \frac{dl_{\pi_q}}{d^2 \pi_q} &= -\frac{\sum_{j_q=1}^{m_q} \hat{\gamma}_{j_q} + a_q - 1}{\pi_q^2} - \frac{n_q - \sum_{j_q=1}^{m_q} \hat{\gamma}_{j_q} + b_q - 1}{(1 - \pi_q)^2}. \end{aligned}$$

Then the Fisher informations of  $\sigma_q^2, \pi_q$  are given by

$$\begin{aligned} I(\sigma_q^2) &= \frac{1}{(\sigma_q^2)^2} \left( \sum_{j_q=1}^{m_q} \hat{\gamma}_{j_q} (\tau - 0.5) - (k_1 + 1) + \frac{2k_2}{\sigma_q^2} \right), \\ I(\pi_q) &= \frac{\sum_{j_q=1}^{m_q} \hat{\gamma}_{j_q} + a_q - 1}{\pi_q^2} + \frac{n_q - \sum_{j_q=1}^{m_q} \hat{\gamma}_{j_q} + b_q - 1}{(1 - \pi_q)^2}. \end{aligned}$$

The  $(1 - \alpha)\%$  confidence intervals of  $\sigma_q^2, \pi_q$  can be constructed by

$$\hat{\sigma}_q^2 \pm Z_{\alpha/2} \sqrt{I(\hat{\sigma}_q^2)^{-1}}, \quad \hat{\pi}_q \pm Z_{\alpha/2} \sqrt{I(\hat{\pi}_q)^{-1}}, \quad (16)$$

where  $Z_{\alpha/2}$  is the upper  $\alpha/2$  quantile of the standard normal distribution  $N(0, 1)$ .

## 4 Compare Enrichment among Multiple Groups

With the MAPs of  $(\pi_q, \sigma_q^2)$  and corresponding standard errors, we can easily compare the enrichment among multiple groups. Take the case with two annotation groups for an example, the 95% confidence intervals of the quantities  $\ln(\pi_1/\pi_2)$ ,  $\ln(\sigma_1^2/\sigma_2^2)$  can be easily approximated by Fieller's theorem [3] (if variables  $a \sim N(a_0, \sigma_a^2)$ ,  $b \sim N(b_0, \sigma_b^2)$ , then  $\ln(a/b) \sim N(\ln(a_0/b_0), \sigma_a^2/a_0^2 + \sigma_b^2/b_0^2)$ ), and then can be used to test whether or not the enrichment is significantly different between two groups (i.e. whether or not the 95% confidence intervals of  $\ln(\pi_1/\pi_2)$ ,  $\ln(\sigma_1^2/\sigma_2^2)$  overlap 0). Moreover, with the approximated variance of the log-ratio by Fieller's theorem, we can calculate a P-value for the null hypothesis that the log-ratio equals 0. For example, the P-value for testing the null hypothesis  $\ln(\pi_1/\pi_2) = 0$  vs. the alternative hypothesis  $\ln(\pi_1/\pi_2) \neq 0$  can be calculated by

$$2 \left( 1 - \Psi \left( \frac{|\ln(\hat{\pi}_1/\hat{\pi}_2)|}{sd(\ln(\pi_1/\pi_2))} \right) \right),$$

where  $\Psi$  is the probability distribution function of  $N(0, 1)$ ,  $(\hat{\pi}_1, \hat{\pi}_2)$  are MAPs, and  $sd(\ln(\pi_1/\pi_2))$  is the standard deviation of  $\ln(\pi_1/\pi_2)$ .

For the case with multiple annotation groups, we can calculate similar quantities to compare the estimates by each group vs. the genome-wide average. That is, for causal probability,  $\ln(\pi_q/\pi_{avg})$  is used to test whether or not the causal probability of group  $q$  is significantly different from the overall average, where  $\pi_{avg} = \sum_{q=1}^Q w_q \pi_q$ ,  $w_q = \frac{m_q}{\sum_{q=1}^Q m_q}$  ( $m_q$  is the number of variants of annotation  $q$ ). For the effect-size variance, a similar quantity  $\ln(\sigma_q^2/\sigma_{avg}^2)$  is used, where  $\sigma_{avg}^2 = \sum_{q=1}^Q f_q \sigma_q^2$  is the weighted average of effect-size variances with weights given by  $f_q = \frac{m_q \pi_q}{\sum_{q=1}^Q m_q \pi_q}$  ( $m_q \pi_q$  is the expected number of associations in annotation category  $q$ ). Again, the hypothesis tests for comparing enrichment among multiple groups can be easily performed, because the approximated 95% confidence intervals of these log-ratios can be easily obtained by Fieller's theorem [3].

In addition, we can approximate the enrichment-fold  $\pi_1/\pi_2$  by  $\exp(\ln(\pi_1/\pi_2))$ , and  $\sigma_1^2/\sigma_2^2$  by  $\exp(\ln(\sigma_1^2/\sigma_2^2))$ .

## 5 Convergence Diagnosis

We used the potential scale reduction factor (PSRF) [4] to quantify the mixing property of MCMC algorithms. With multiple MCMC chains, the PSRF for a parameter is basically the ratio between the overall estimated parameter variance and the within-chain variance. A PSRF value within (0.9, 1.2) suggests that the MCMC algorithm has good mixing property

and posterior samples converge. For example, in Figure S2, we present the PSRFs for the  $E[\gamma_i]$  of top 58 variants with P-values  $< 5 \times 10^{-8}$  in the WTCCC GWAS of Crohn’s disease [1]. We can see that about half of the 58 variants had PSRFs  $> 1.2$  by the standard MCMC algorithm as used in GEMMA [7], while all PSRFs by our MCMC algorithm all fall within  $(0.9, 1.2)$ , suggesting greatly improved mixing property due to the refined proposal distribution and relatively small block-sizes.

## 6 Challenges for Extending bfGWAS for Overlapped and Quantitative Annotations

Theoretically, this Bayesian hierarchical model can be easily extended for analyzing overlapped categorical and quantitative annotations, by assuming the following logistic model for the  $\pi_i$  in model (1),

$$\text{logit}(\pi_i) = \alpha_0 + \mathbf{A}_i^T \boldsymbol{\alpha}. \quad (17)$$

In the logistic model (17),  $\mathbf{A}_i$  is the quantitative annotation vector (with binary values for categorical annotations) for the  $i$ th variant, and  $\boldsymbol{\alpha} = (\alpha_1, \dots, \alpha_Q)$  is the vector of log-odds for all considered annotations. Independent normal distributions can be assumed as the hyper priors for the category-specific (enrichment) parameters  $(\alpha_0, \boldsymbol{\alpha})$ . With a large number of annotations, variable selection of annotations might even be integrated by assuming independent point-normal priors for  $\boldsymbol{\alpha}$ .

Conditioning on values for  $(\alpha_0, \boldsymbol{\alpha})$ , the MCMC algorithm (Section 2.2) can be implemented similarly per block in the E-step. However, in the M-step, analytical formulas are no longer available for the posterior MAPs of  $(\alpha_0, \boldsymbol{\alpha})$ . In preliminary analysis, we found that the false positive rate was inflated due to over estimated  $\pi_i$ , which is due to the difficulties of estimating  $(\alpha_0, \boldsymbol{\alpha})$ . We are still exploring an appropriate approach to effectively control the false positive rate for this extension.

## 7 Software

Software implementing this Bayesian hierarchical model with the EM-MCMC algorithm, referred as Bayesian Functional Genome-wide Association Study (bfGWAS), is now available at GitHub (<https://github.com/yjingj/bfGWAS>). Within the software, the E-step (MCMC algorithm) is written in C++ language; the M-step is written in an R script; and both steps are wrapped together (enabling parallel computation) through submitting jobs by a Makefile that is generated by a Perl script.

# Supplemental Figures

Figure S 1: Flowcharts of bfGWAS.

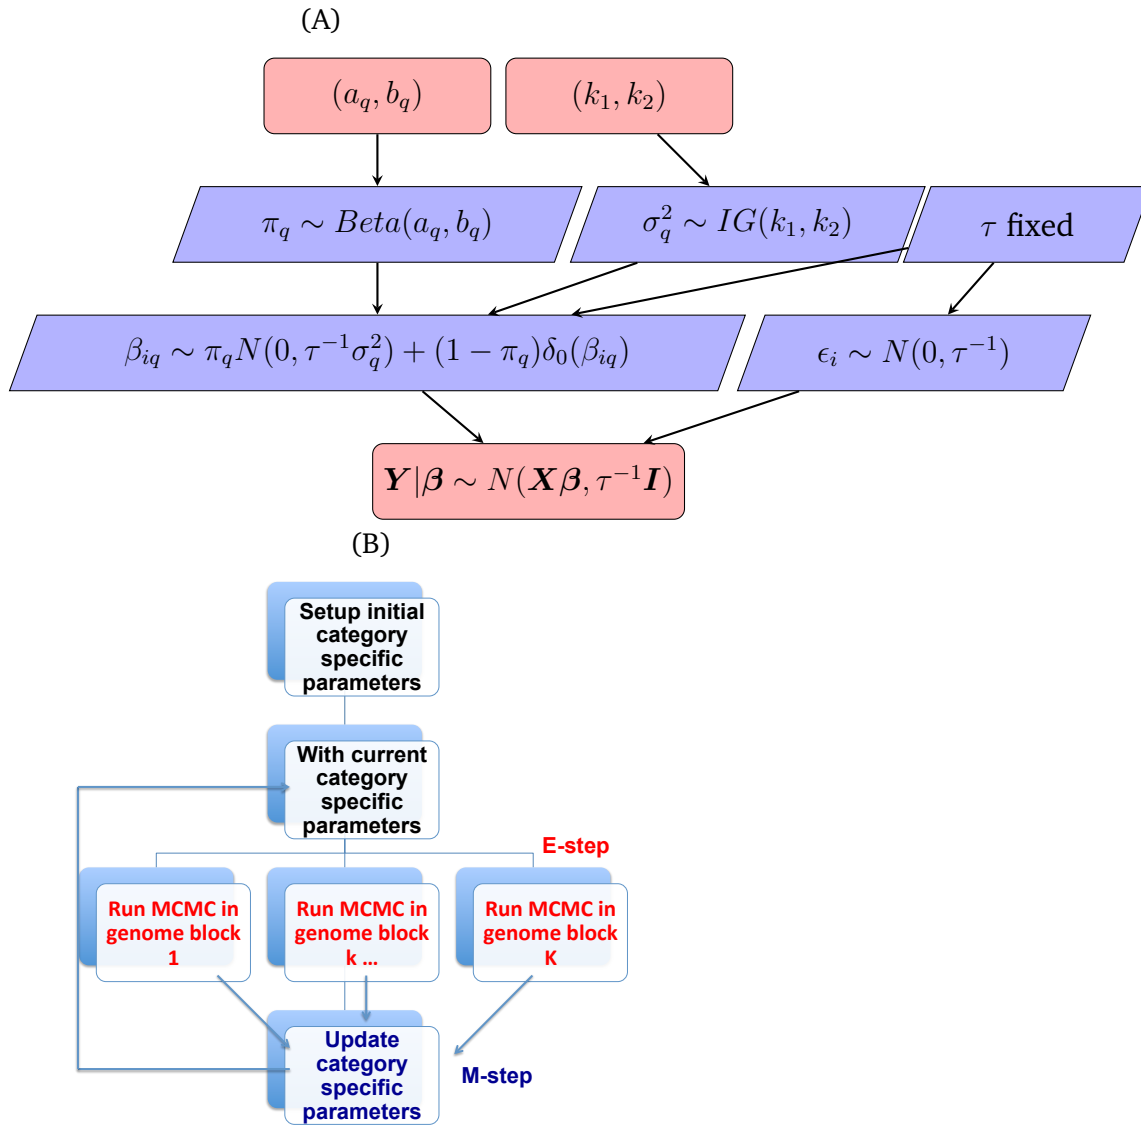

(A) Hierarchical Bayesian variable selection model; (B) EM-MCMC algorithm.



**Figure S 2:** Plots of the potential scale reduction factors (PSRF).

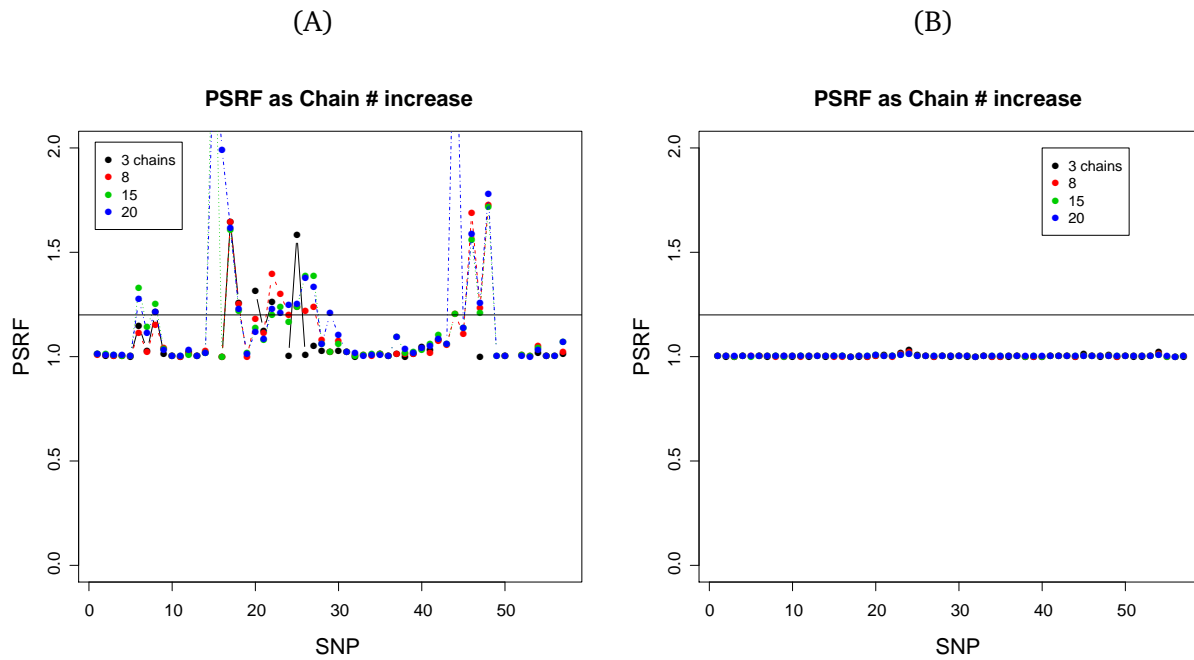

Potential scale reduction factors (PSRF) of the Bayesian posterior inclusion probabilities of 58 top marginally significant SNPs (WTCCC GWAS of Crohn's disease) with 3, 8, 15, and 20 MCMC chains, where PSRF within (0.9, 1.2) suggests good mixing property. (A) Standard MCMC algorithm as used in GEMMA; (B) Our MCMC algorithm.

Figure S 3: Prioritization ranks of the true causal SNP1 (pink) and SNP2 (cyan).

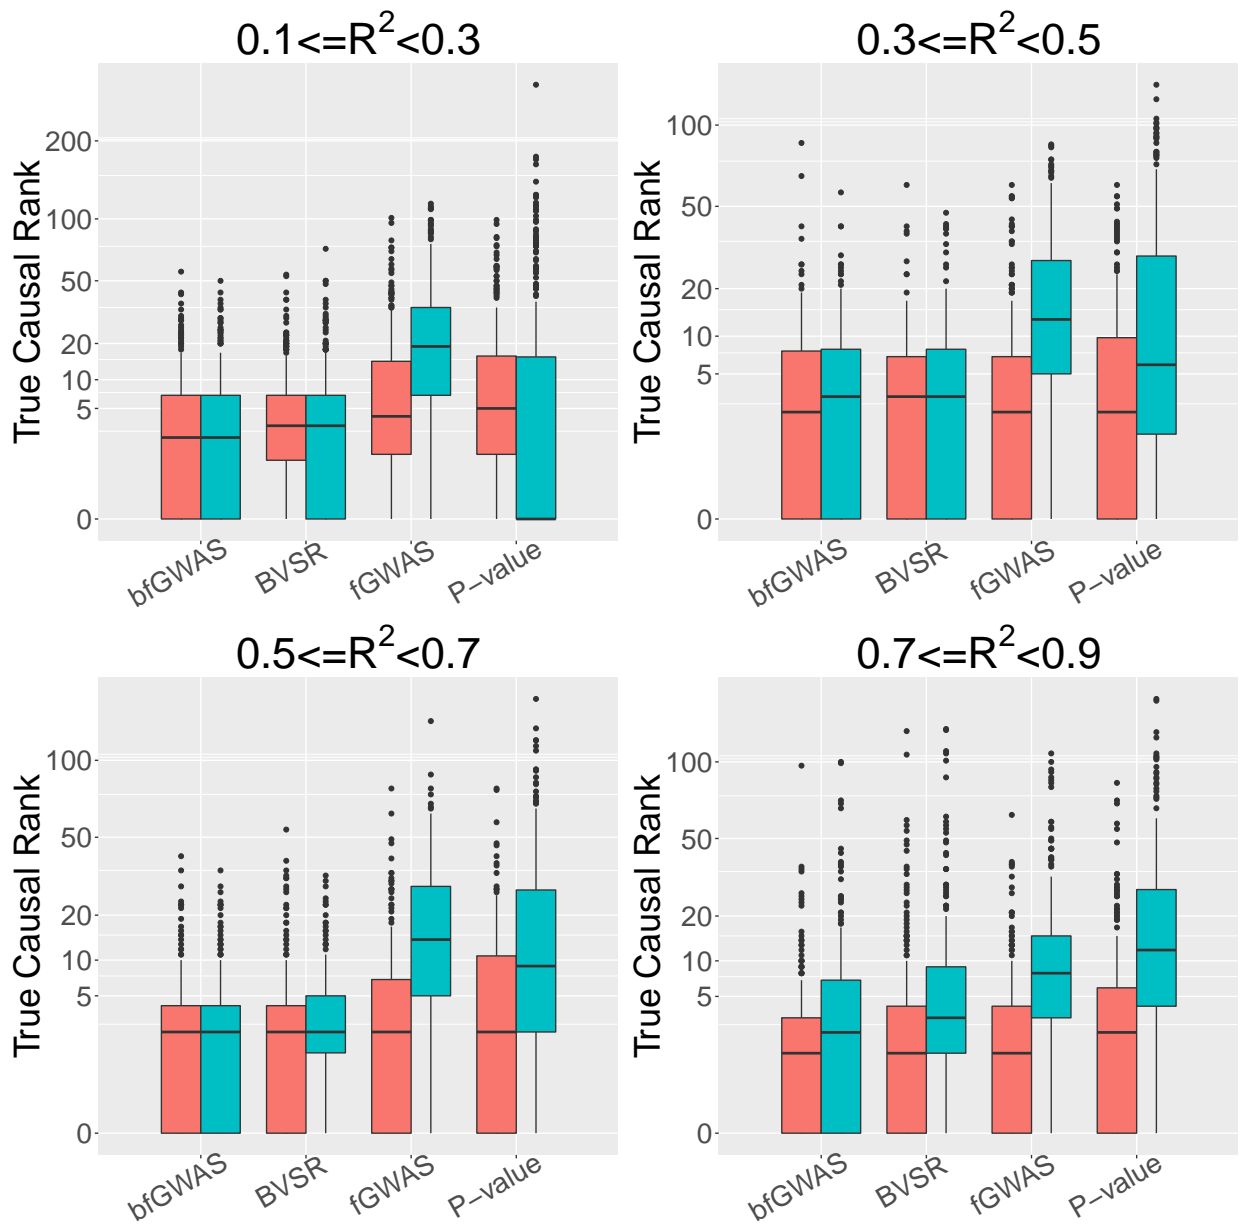

Ranks prioritized by bfGWAS, the standard Bayesian variable selection regression model (BVSR), fgWAS, P-value (single variant test for SNP1 and conditional analysis for SNP2), stratified by the  $R^2$  (LD) between SNP1 and SNP2. Here higher ranks (smaller numeric values) suggest higher power.

**Figure S 4:** Estimates of the log-relative-risk  $\ln(\pi_0/\pi_1)$  by bfGWAS and the enrich-parameter by fGWAS, along with 95% confidence intervals.

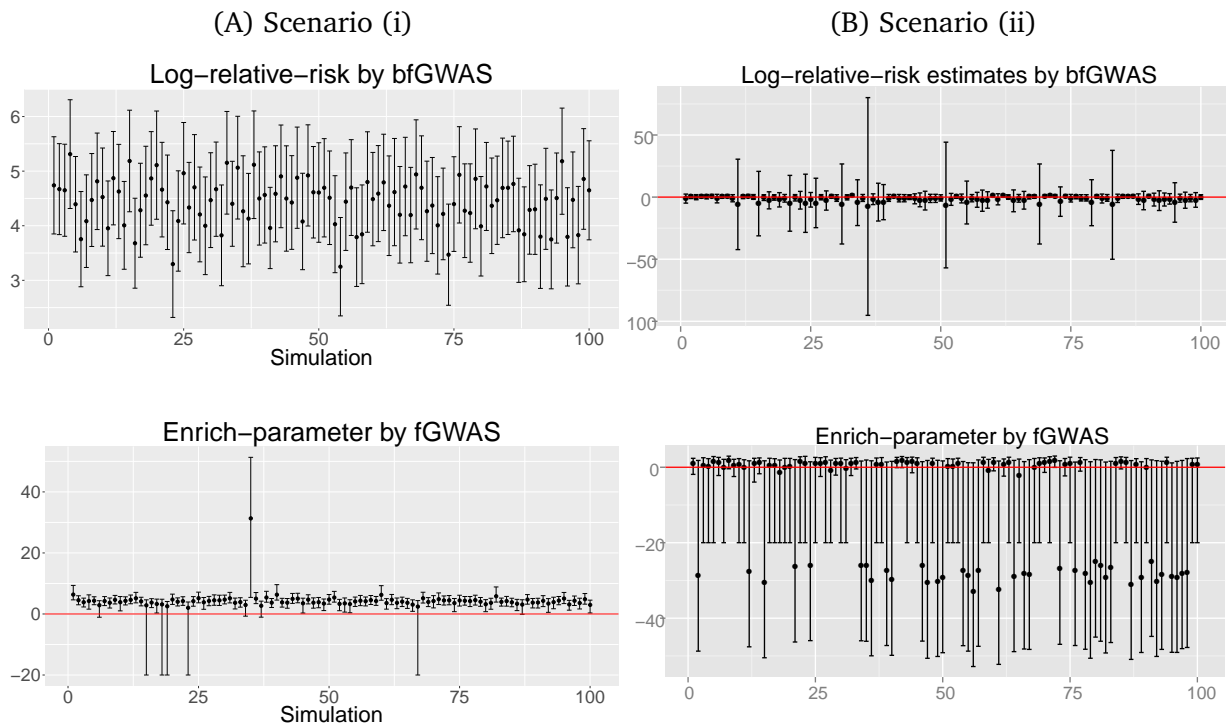

(A) Simulation scenario (i) with enrichment in coding and Scenario; (B) Simulation scenario (ii) with no enrichment. No enrichment is estimated when the 95% confidence interval covers 0, while enrichment for coding is estimated with the 95% confidence interval above 0.

**Figure S 5:** Estimates of the log-ratio of effect-size variances  $\ln(\sigma_0^2/\sigma_1^2)$  by bfGWAS, along with 95% confidence intervals.

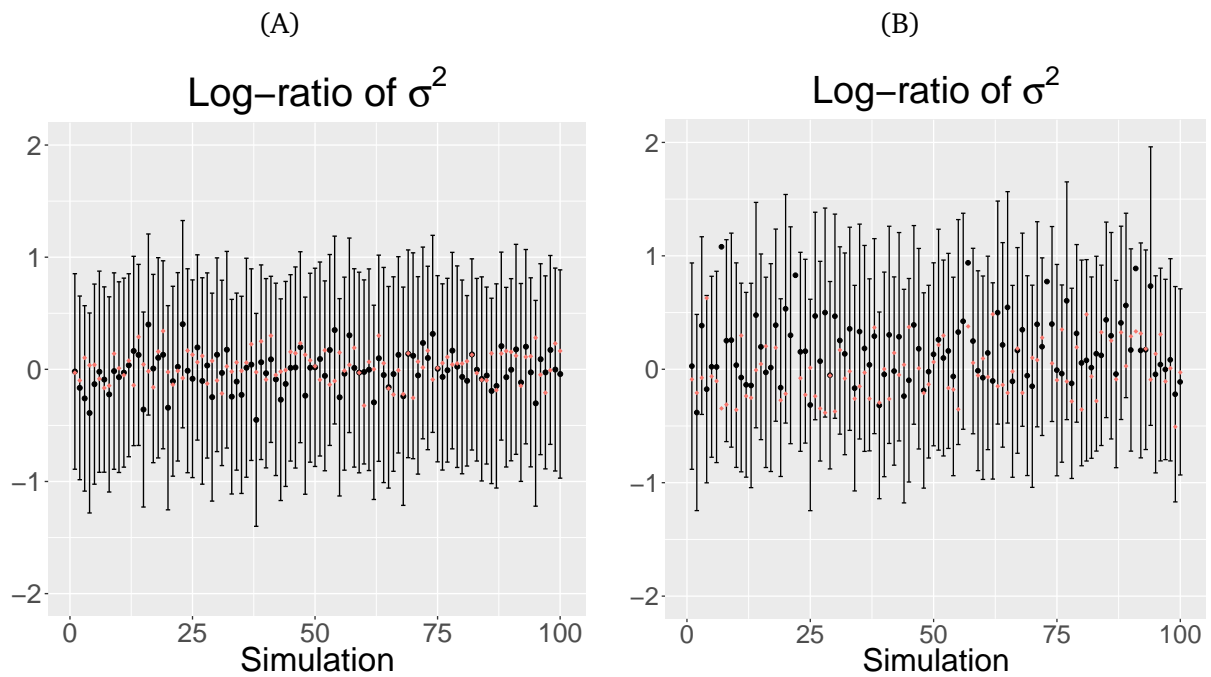

(A) Simulation scenario (i) with enrichment in coding; (B) Simulation scenario (ii) with no enrichment. Note that the effect-sizes of both groups in scenarios (i) and (ii) were simulated from the same normal distribution, thus the 95% confidence intervals covering 0 suggest that bfGWAS estimates similar effect-size variances between two categories.

Figure S 6: Sorted top bfGWAS PPs versus sorted top  $-\log_{10}(\text{P-values})$  of single variant tests.

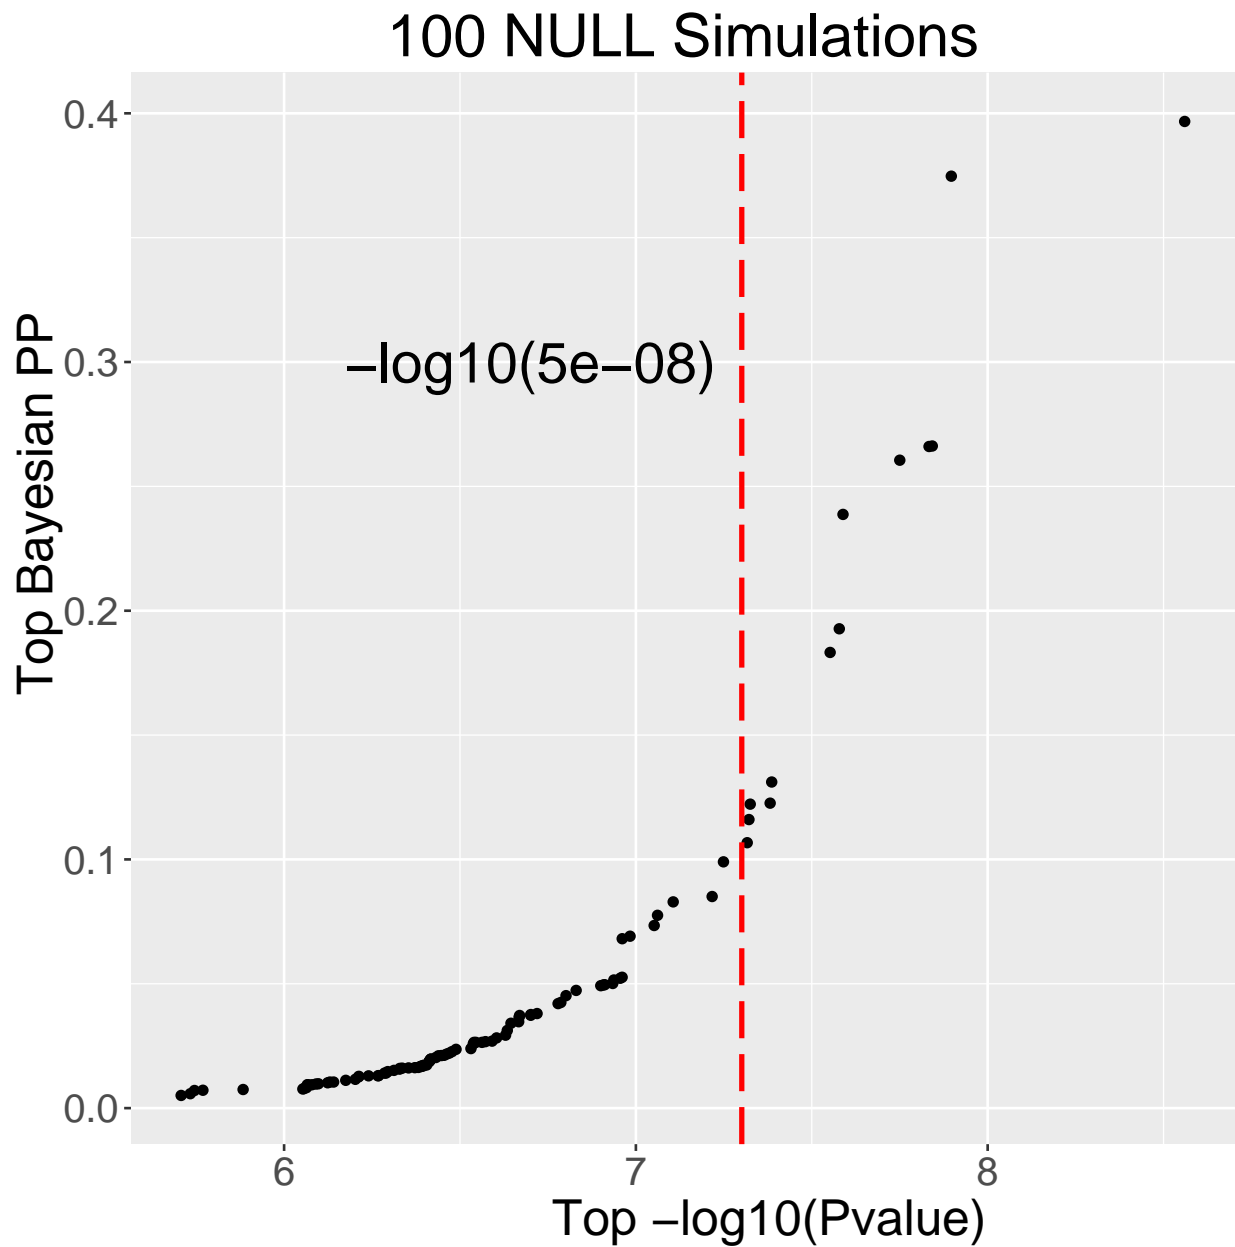

Results of 100 GWASs with AMD genotype data and permuted phenotypes. Note that the P-value  $5 \times 10^{-8}$  roughly corresponds to bfGWAS posterior inclusion probability (PP) 0.1068.

**Figure S 7:** Manhattan plot highlighting AMD GWAS signals with BVR  $PP > 0.1068$ .

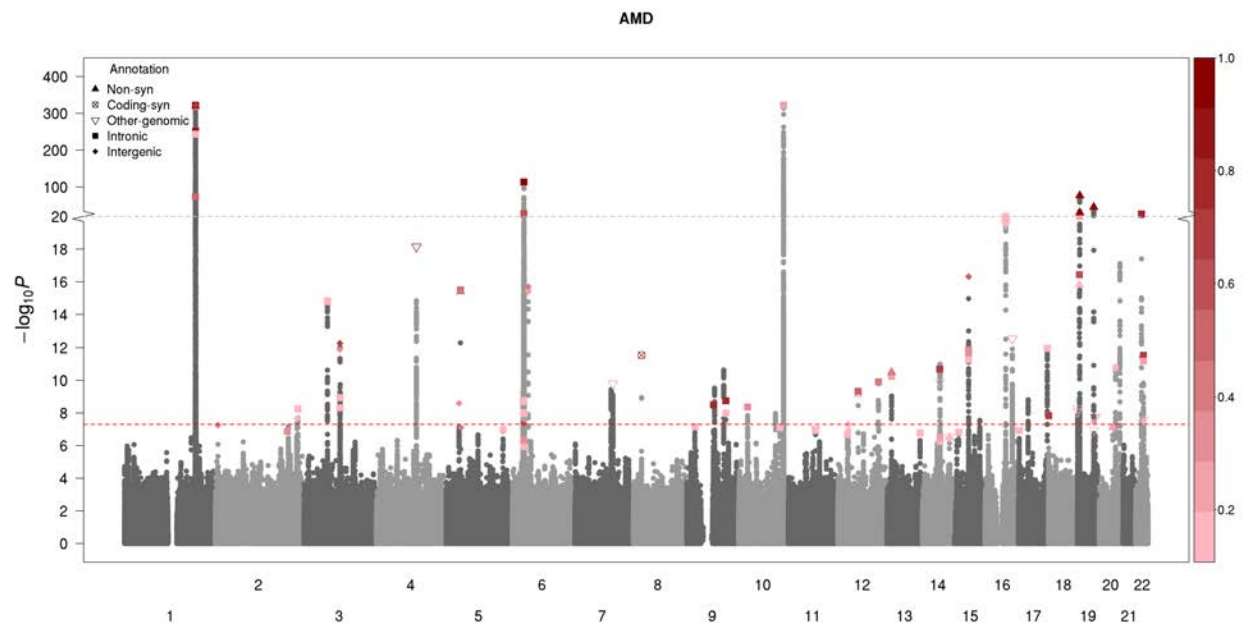

**Figure S 8:** Manhattan plots highlighting AMD GWAS signals by accounting for gene-based annotations.

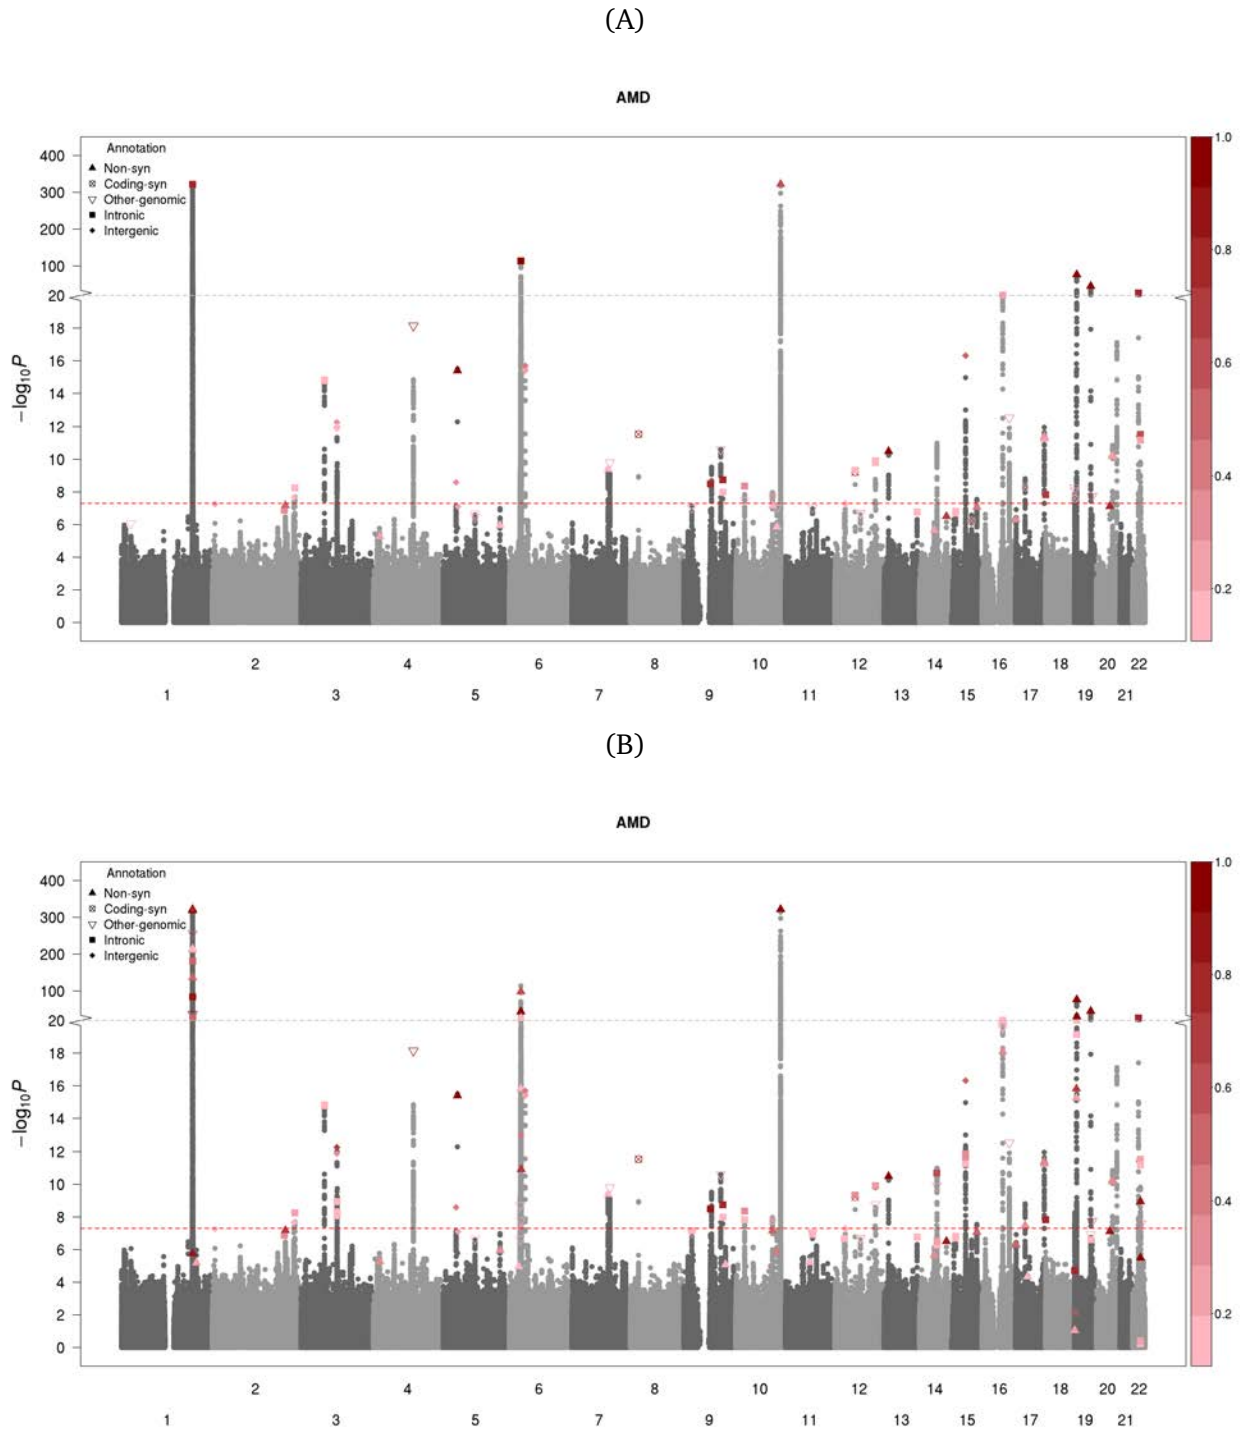

(A) Highlighting signals with fGWAS posterior association probability (PP)  $> 0.1068$  are colored; (B) Highlighting signals with bfGWAS PP  $> 0.1068$ .

Figure S 9: LocusZoom plots of region *CHR19:6218146-7218146*.

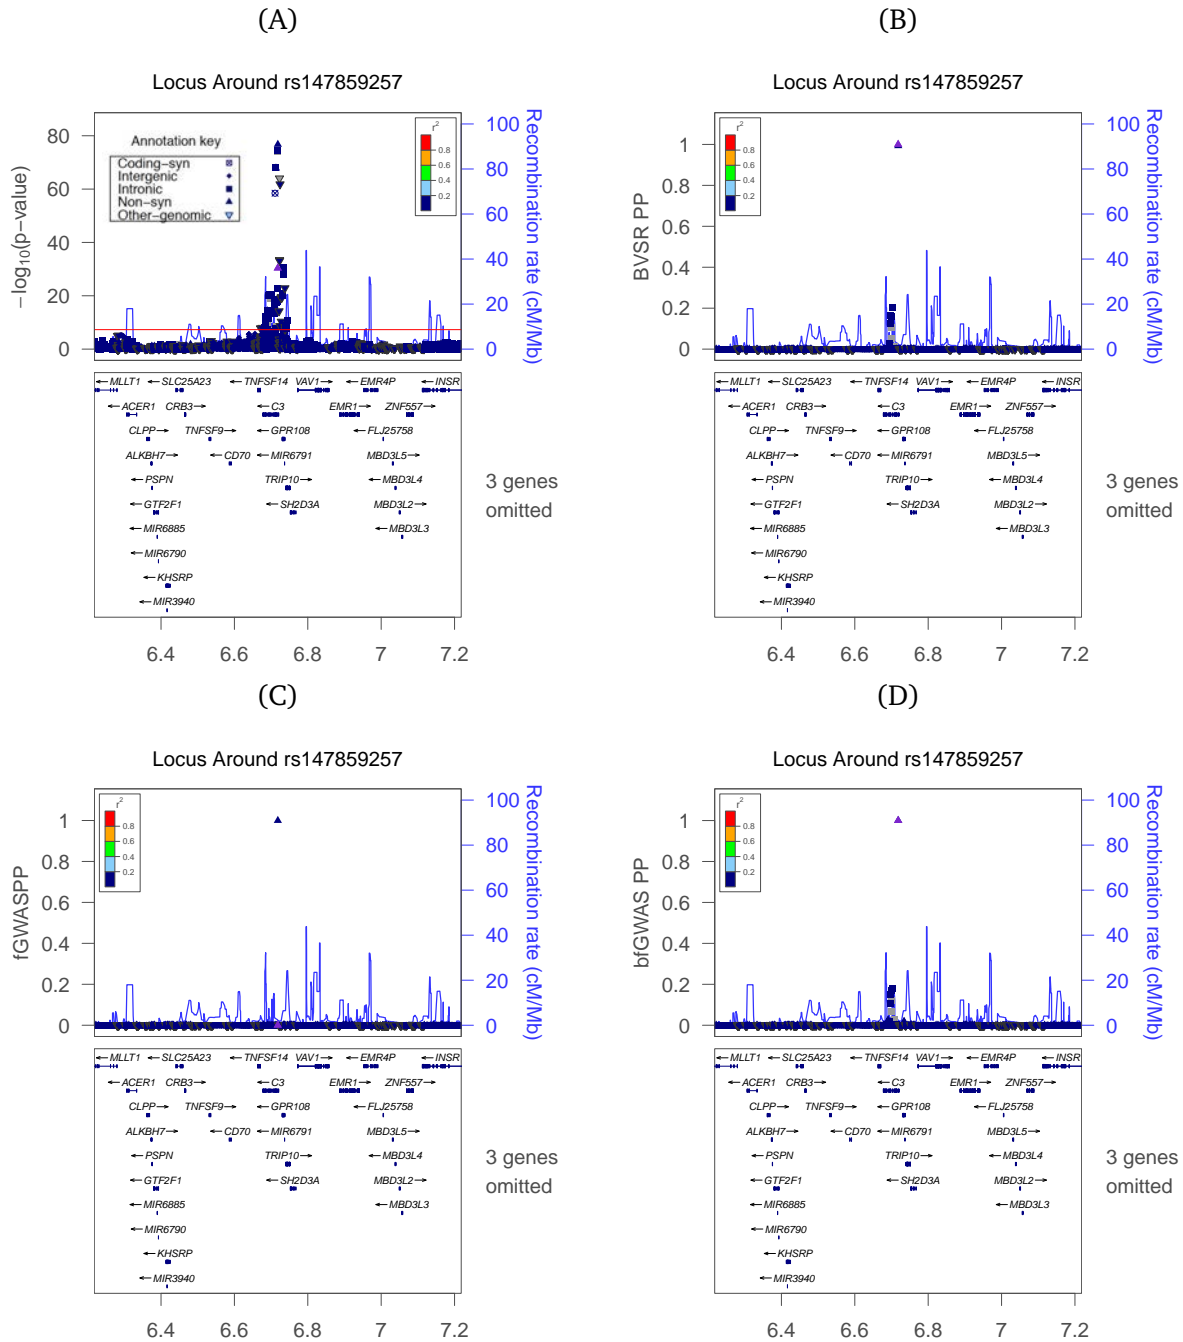

(A) P-values by single variant tests; (B) BVSr PPs; (C) fgWAS PPs; (D) bfGWAS PPs. The purple triangle in (B, D) denotes the variant *rs147859257*; the blue triangle in (A, C) denotes the top significant variant by single variant tests *rs2230199*.



**Figure S 10:** Enrichment analysis results with varying prior means as well as starting values ( $10^{-6}, 5 \times 10^{-6}, 10^{-5}$ ) for  $\pi_q$ , and varying starting values (10, 5, 1) for  $\sigma_q^2$ .

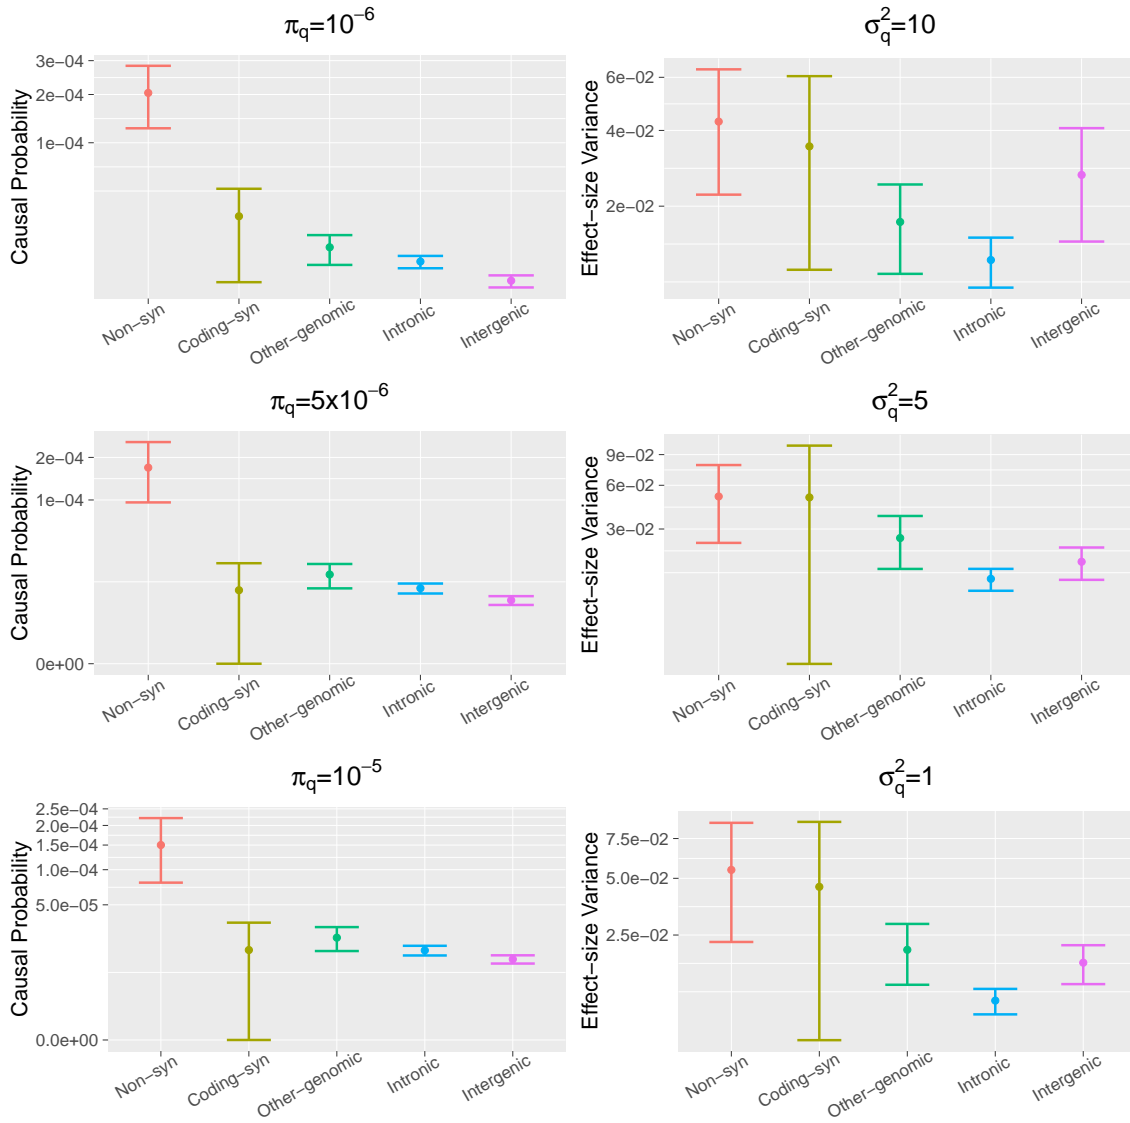

**Figure S 11:** fGWAS enrichment estimates with 95% error bars.

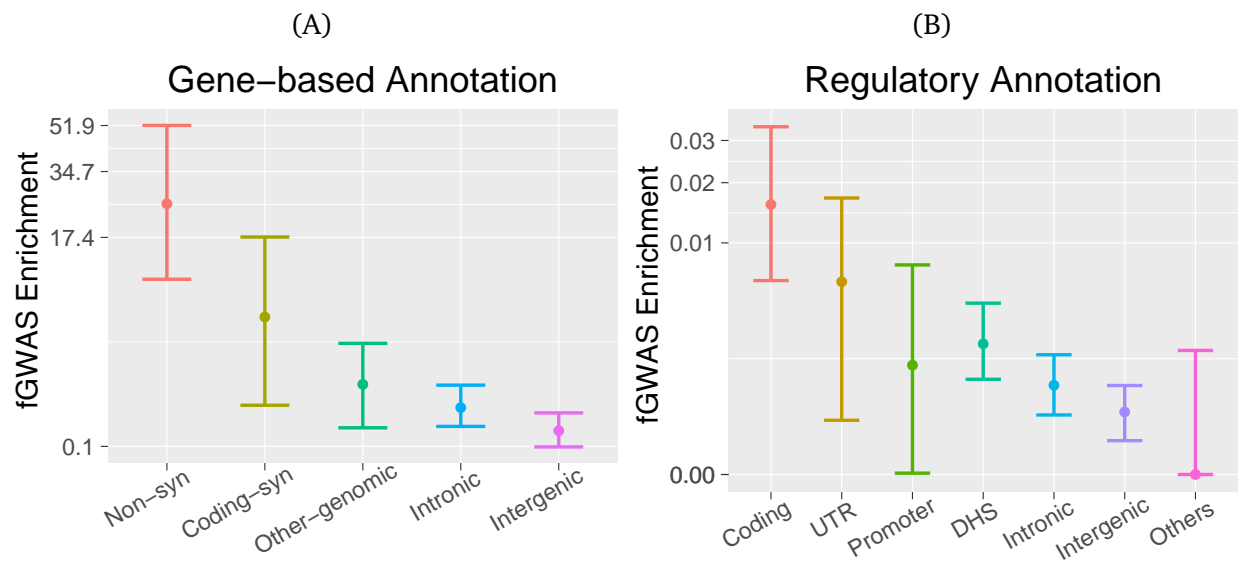

**Figure S 12:** Ratios of enrich parameters versus the respective genome-wide averages, along with 95% confidence intervals.

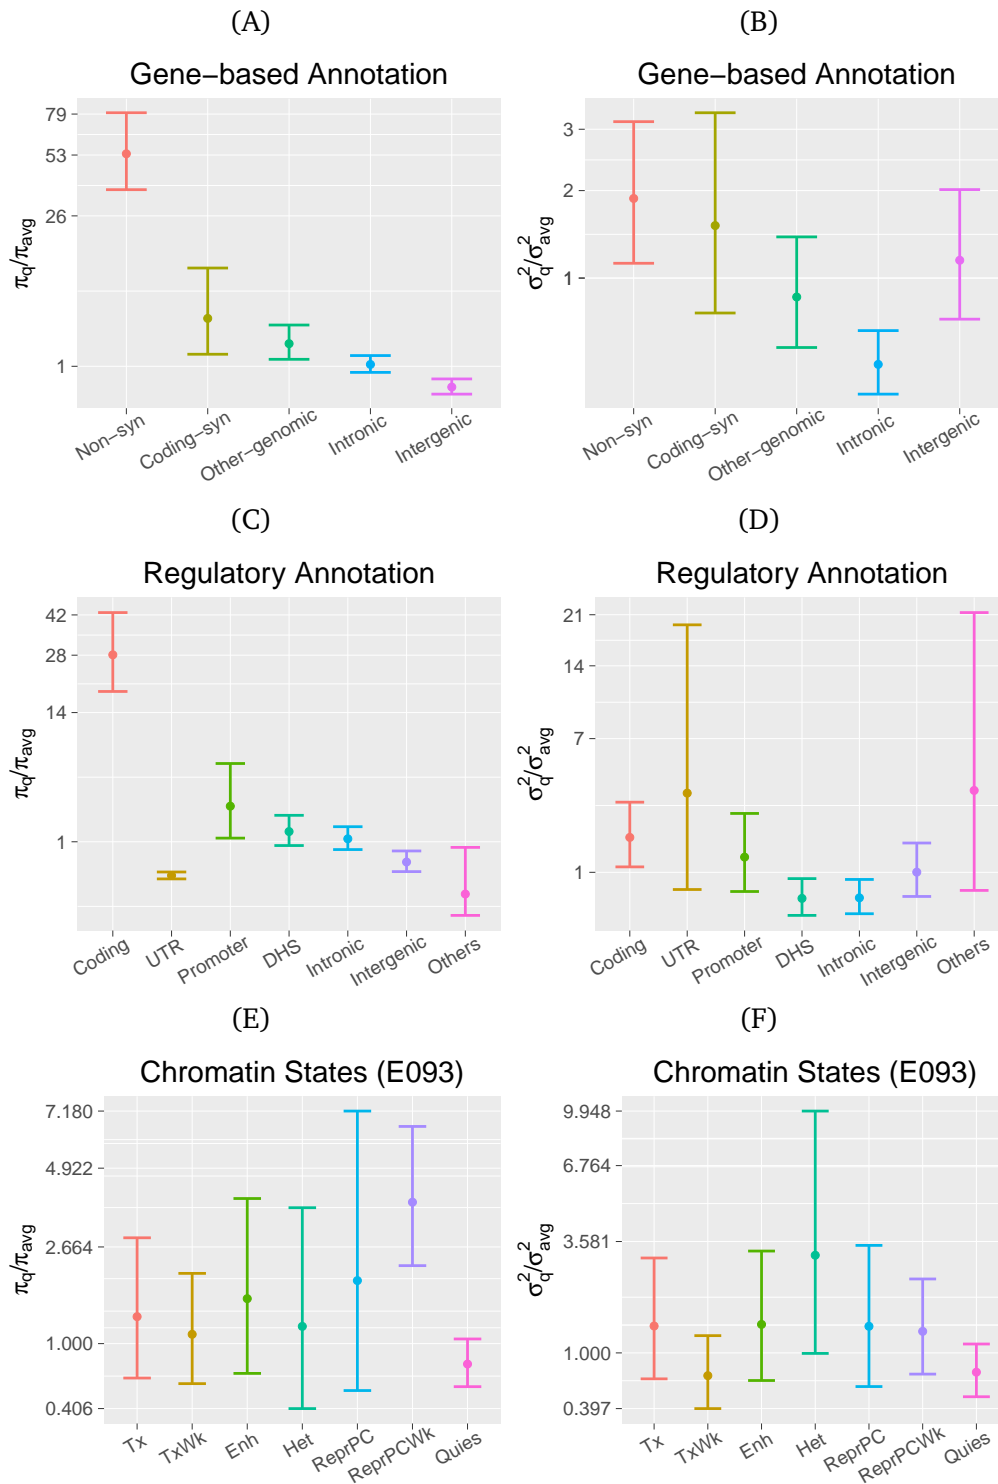

(A, C, E) Causal probability ratios ( $\pi_q/\pi_{avg}$ ); (B, D, F) Effect-size variance ratios ( $\sigma_q^2/\sigma_{avg}^2$ ).

**Figure S 13:** Enrichment analysis results for the AMD GWAS data with chromatin states profiled with respect to the epigenome of fetal thymus (E093).

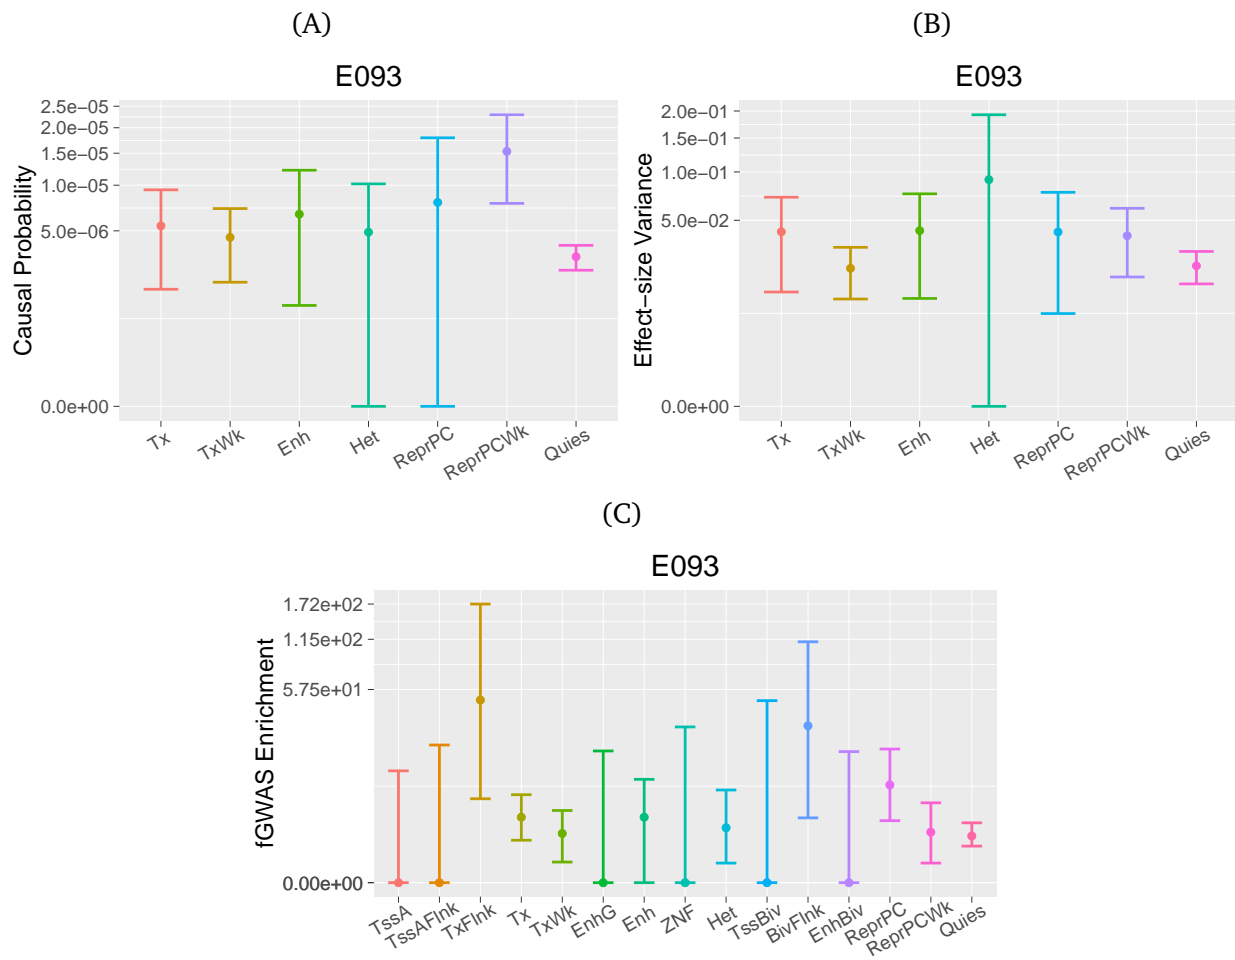

**Figure S 14:** Manhattan plot highlighting MGI GWAS signals of skin cancer with BVSr PP > 0.1068.

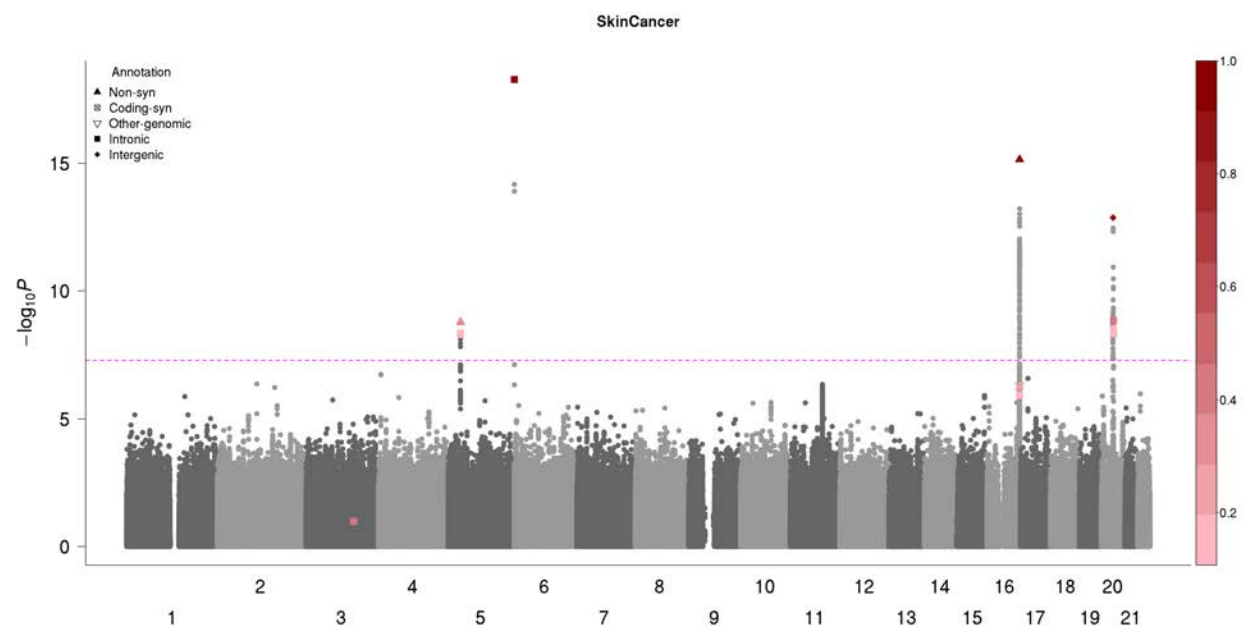

**Figure S 15:** Manhattan plots highlighting MGI GWAS signals of skin cancer by accounting for gene-based annotations.

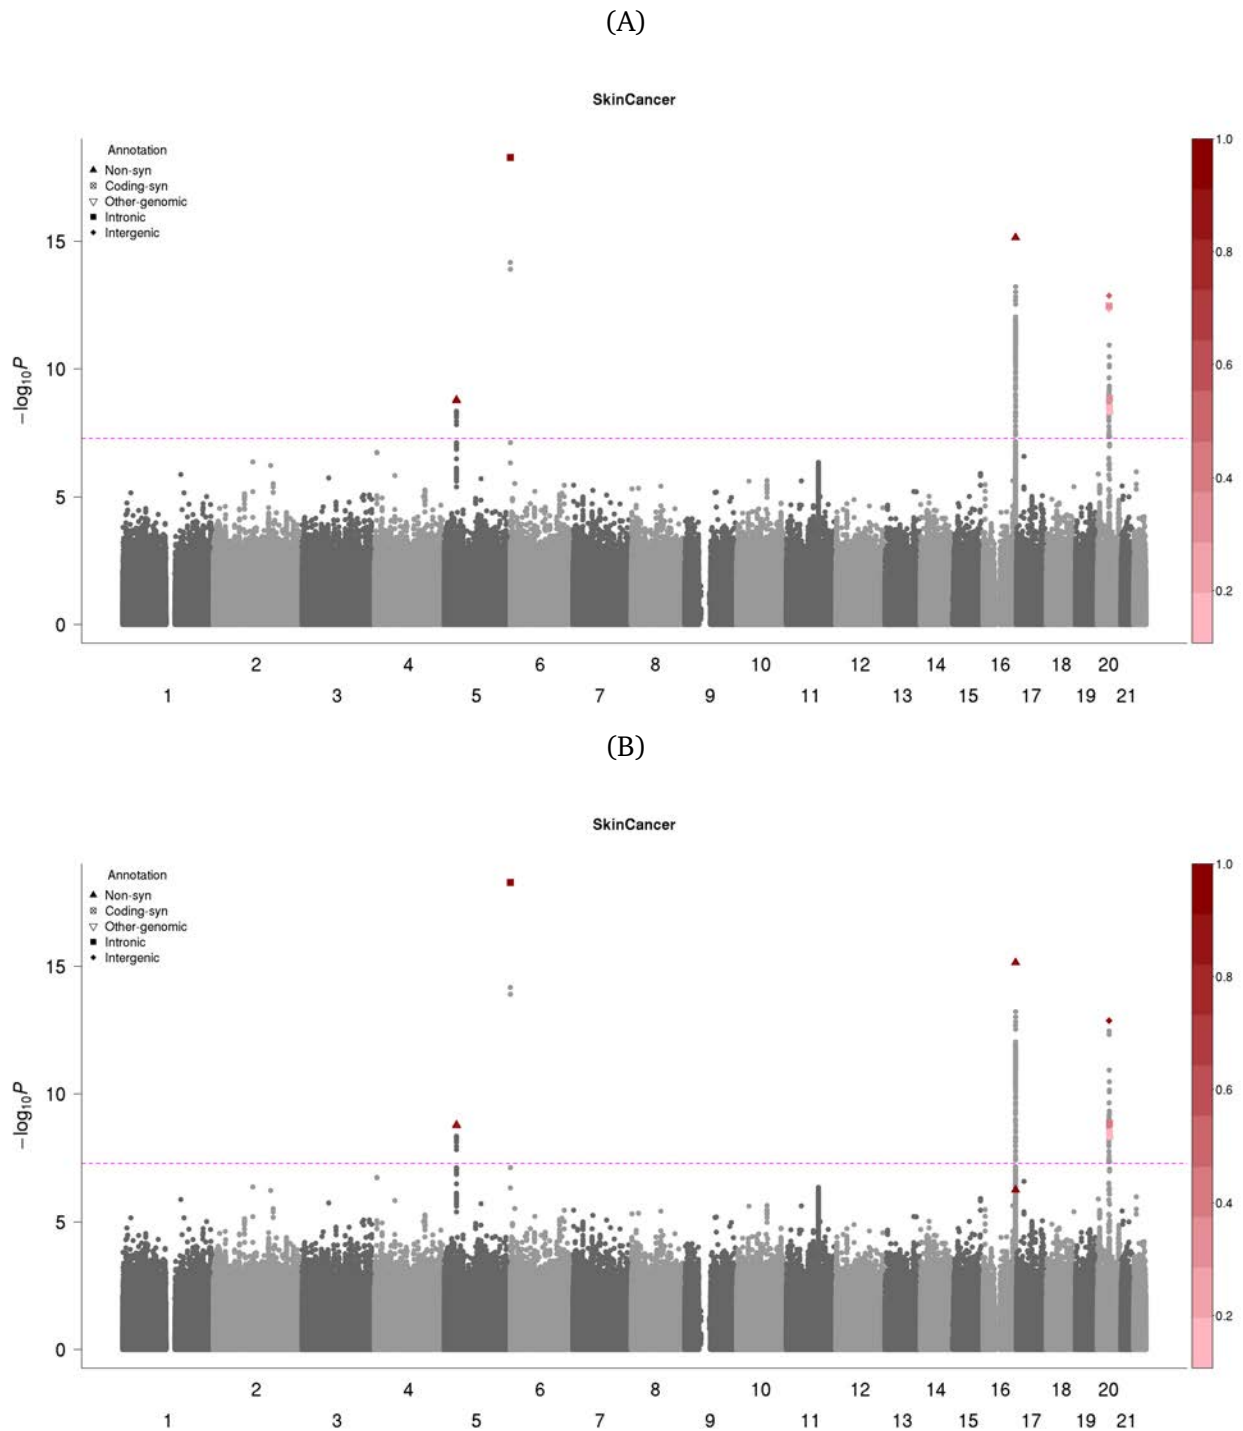

(A) Highlighting signals with with fGWAS  $PP > 0.1068$ ; (B) Highlighting signals with bfGWAS  $PP > 0.1068$ . Variants with  $PP > 0.1068$  are plotted in different shapes with respect to gene-based annotations.

**Figure S 16:** Enrichment analysis results of the MGI GWAS of skin cancer, accounting for gene-based annotations.

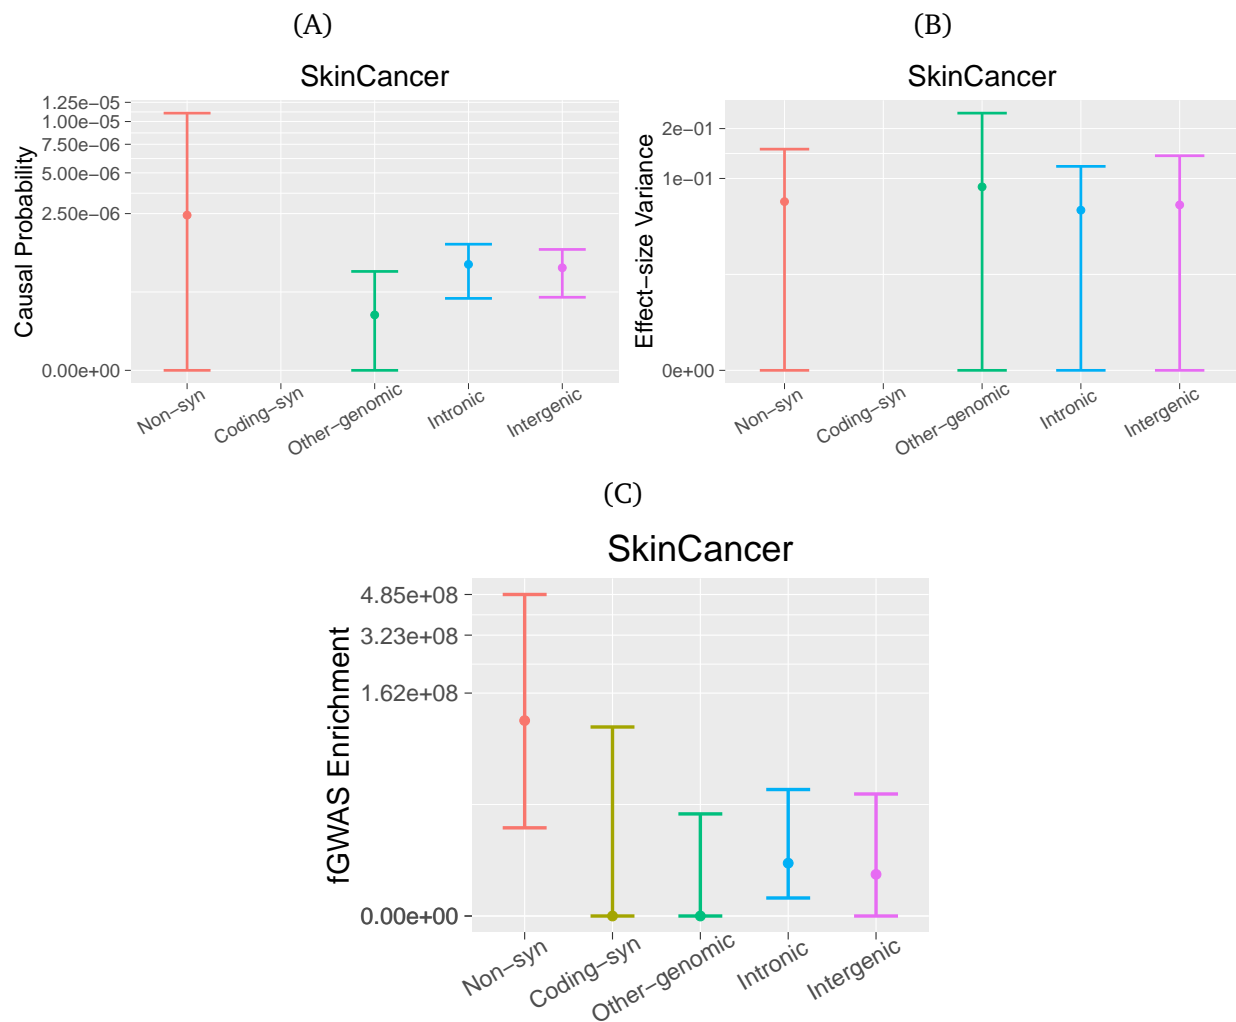

**Figure S 17:** LocusZoom plots in the region of *CHR16:89686117-90172696*.

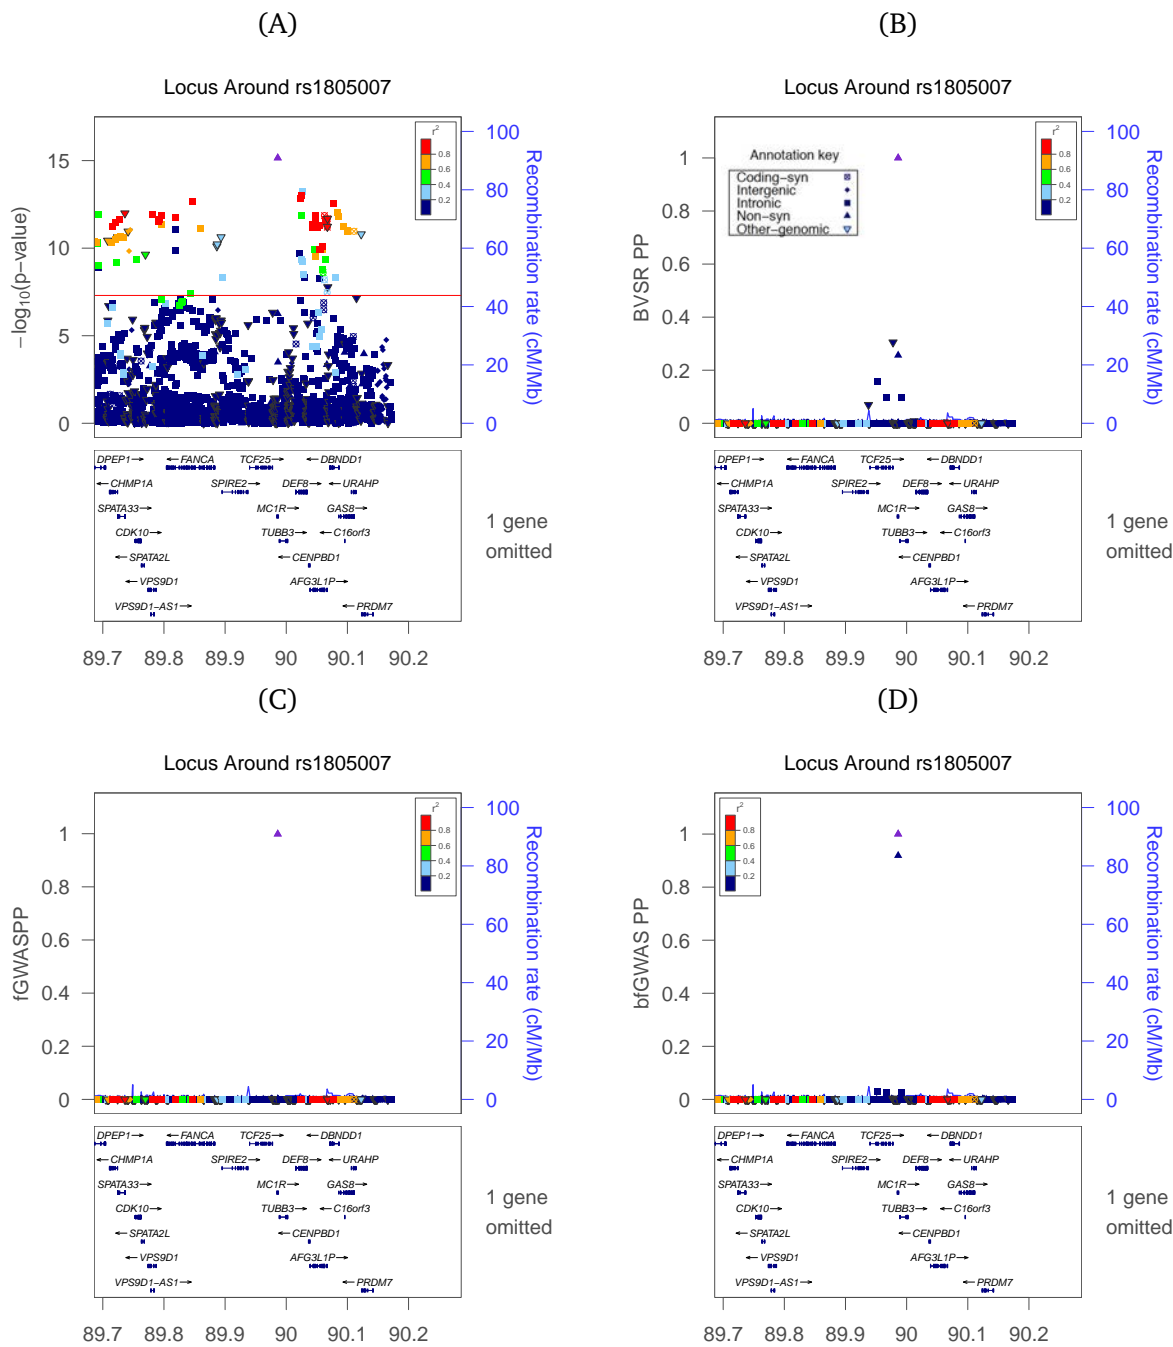

(A) P-values by single variant tests; (B) BVSr PPs; (C) fgWAS PPs; (D) bfGwas PPs. The purple triangle denotes the variant *rs1805007*.



## Supplemental Tables

**Table S1:** Classification of gene-based functional annotations.

| Native gene-based functional annotations                                                                                | Annotation categories considered in the analysis |
|-------------------------------------------------------------------------------------------------------------------------|--------------------------------------------------|
| frameshift, frameshift-near-splice                                                                                      | Non-synonymous                                   |
| splice-acceptor, splice-donor,                                                                                          |                                                  |
| stop-gained, stop-gained-near-splice, stop-lost                                                                         |                                                  |
| missense, missense-near-splice                                                                                          |                                                  |
| synonymous-near-splice, non-coding-exon-near-splice, coding-near-splice, coding-unknown-near-splice, intron-near-splice |                                                  |
| coding, coding-unknown, synonymous, nc-transcript-variant                                                               | Coding-synonymous                                |
| intronic                                                                                                                | Intronic                                         |
| intergenic, NAs                                                                                                         | Intergenic                                       |
| 3-prime-UTR, 5-prime-UTR,                                                                                               | Other-genomic                                    |
| downstream-gene, upstream-gene, non-coding-exon                                                                         |                                                  |

**Table S2:** Compare results by P-value, fGWAS, and bfGWAS in the 34 known AMD loci, accounting for gene-based annotations.

| Known 34 Loci        |     |             |             | Top significant variant by P-value |                |       |                        |               | Bayesian Regional-PP | fGWAS Regional-PP |
|----------------------|-----|-------------|-------------|------------------------------------|----------------|-------|------------------------|---------------|----------------------|-------------------|
| Locus name           | Chr | Start       | End         | dbSNPID                            | Chr:Position   | MAF   | P-value                | Anno          |                      |                   |
| <i>CFH</i>           | 1   | 195,679,832 | 197,768,053 | rs10922109                         | 1:196,704,632  | 0.329 | $<9 \times 10^{-321}$  | intronic      | 1.000                | 1.000             |
| <i>COL4A3</i>        | 2   | 227,573,015 | 228,592,110 | rs11884770                         | 2:228,086,920  | 0.731 | $5.6 \times 10^{-9}$   | intronic      | 0.984                | 0.986             |
| <i>ADAMTS9-AS</i>    | 3   | 64,199,445  | 65,230,121  | rs62247658                         | 3:64,715,155   | 0.551 | $1.4 \times 10^{-15}$  | intronic      | 0.978                | 1.000             |
| <i>COL8A1</i>        | 3   | 98,551,114  | 100,381,567 | rs140647181                        | 3:99,180,668   | 0.019 | $5.4 \times 10^{-13}$  | intergenic    | 1.000                | 0.999             |
| <i>CFI</i>           | 4   | 110,126,506 | 111,185,820 | rs10033900                         | 4:110,659,067  | 0.506 | $7.1 \times 10^{-19}$  | downstream    | 1.000                | 1.000             |
| <i>C9</i>            | 5   | 38,699,134  | 39,831,894  | rs62358361                         | 5:39,327,888   | 0.012 | $3.1 \times 10^{-16}$  | intronic      | 1.000                | 1.000             |
| <i>PRLR/SPEF2</i>    | 5   | 34,769,332  | 36,493,378  | rs114092250                        | 5:35,494,448   | 0.018 | $2.5 \times 10^{-9}$   | intergenic    | 0.961                | 0.987             |
| <i>C2/CFB/SKIV2L</i> | 6   | 30,505,490  | 33,238,589  | rs116503776                        | 6:31,930,462   | 0.120 | $2.1 \times 10^{-114}$ | intronic      | 1.000                | 1.000             |
| <i>VEGFA</i>         | 6   | 43,305,296  | 44,329,629  | rs943080                           | 6:43,826,627   | 0.518 | $2.0 \times 10^{-16}$  | intergenic    | 1.000                | 1.000             |
| <i>KMT2E/SRPK2</i>   | 7   | 104,081,402 | 105,563,372 | rs1142                             | 7:104,756,326  | 0.357 | $1.5 \times 10^{-10}$  | downstream    | 0.999                | 0.999             |
| <i>PILRB/PILRA</i>   | 7   | 99,394,940  | 100,611,776 | rs7803454                          | 7:99,991,548   | 0.199 | $3.6 \times 10^{-10}$  | intronic      | 0.999                | 0.999             |
| <i>TNFRSF10B</i>     | 8   | 22,582,971  | 23,588,984  | rs79037040                         | 8:23,080,971   | 0.534 | $2.9 \times 10^{-12}$  | nc-transcript | 1.000                | 0.999             |
| <i>MIR6130/RORB</i>  | 9   | 75,935,160  | 77,189,752  | rs10781180                         | 9:76,615,662   | 0.683 | $3.0 \times 10^{-10}$  | intergenic    | 0.997                | 0.999             |
| <i>TRPM3</i>         | 9   | 72,938,605  | 73,946,180  | rs7150714                          | 9:73,438,605   | 0.584 | $3.2 \times 10^{-9}$   | intronic      | 0.929                | 0.999             |
| <i>TGFBR1</i>        | 9   | 101,358,102 | 102,431,769 | rs1626340                          | 9:101,923,372  | 0.199 | $2.3 \times 10^{-11}$  | intergenic    | 1.000                | 0.999             |
| <i>ABCA1</i>         | 9   | 107,139,414 | 108,167,147 | rs2740488                          | 9:107,661,742  | 0.265 | $1.7 \times 10^{-9}$   | intronic      | 0.963                | 0.985             |
| <i>ARHGAP21</i>      | 10  | 24,360,361  | 25,556,538  | rs12357257                         | 10:24,999,593  | 0.232 | $4.3 \times 10^{-9}$   | intronic      | 0.962                | 0.986             |
| <i>ARMS2/HTRA1</i>   | 10  | 123,702,126 | 124,735,355 | rs3750846                          | 10:124,215,565 | 0.316 | $<9 \times 10^{-321}$  | intronic      | 1.000                | 1.000             |
| <i>RDH5/CD63</i>     | 12  | 55,615,585  | 56,713,297  | rs3138141                          | 12:56,115,778  | 0.214 | $4.7 \times 10^{-10}$  | intronic      | 0.034                | 0.999             |
| <i>ACAD10</i>        | 12  | 110,919,995 | 113,502,935 | rs73205633                         | 12:112,357,085 | 0.019 | $1.2 \times 10^{-10}$  | intergenic    | 0.997                | 0.999             |

| Known 34 Loci         |     |            |            | Top significant variant by P-value |               |       |                       |               | Bayesian Regional-PP | fGWAS Regional-PP |
|-----------------------|-----|------------|------------|------------------------------------|---------------|-------|-----------------------|---------------|----------------------|-------------------|
| Locus name            | Chr | Start      | End        | dbSNPID                            | Chr:Position  | MAF   | P-value               | Anno          |                      |                   |
| <i>B3GALT1</i>        | 13  | 31,242,232 | 32,339,274 | rs9564692                          | 13:31,821,240 | 0.288 | $3.2 \times 10^{-11}$ | splice        | 1.000                | 0.999             |
| <i>RAD51B</i>         | 14  | 68,227,506 | 69,550,783 | rs1956526                          | 14:68,799,787 | 0.650 | $1.0 \times 10^{-11}$ | intronic      | 1.000                | 0.999             |
| <i>LIPC</i>           | 15  | 58,171,721 | 59,242,418 | rs2414577                          | 15:58,680,638 | 0.365 | $4.8 \times 10^{-17}$ | nc-transcript | 1.000                | 1.000             |
| <i>CETP</i>           | 16  | 56,485,514 | 57,506,829 | rs5817082                          | 16:56,997,349 | 0.248 | $1.7 \times 10^{-21}$ | intronic      | 1.000                | 1.000             |
| <i>CTRB2/CTRB1</i>    | 16  | 74,732,528 | 76,017,115 | rs72802342                         | 16:75,234,872 | 0.073 | $2.8 \times 10^{-13}$ | downstream    | 1.000                | 1.000             |
| <i>TMEM97/VTN</i>     | 17  | 26,092,946 | 27,240,139 | rs11080055                         | 17:26,649,724 | 0.524 | $1.5 \times 10^{-9}$  | intronic      | 0.996                | 0.998             |
| <i>NPLOC4/TSPAN10</i> | 17  | 79,015,509 | 80,186,552 | rs6565597                          | 17:79,526,821 | 0.390 | $1.0 \times 10^{-12}$ | intronic      | 1.000                | 0.999             |
| <i>C3</i>             | 19  | 5,311,717  | 7,224,340  | rs2230199                          | 19:6,718,387  | 0.764 | $1.7 \times 10^{-77}$ | missense      | 1.000                | 1.000             |
| <i>CNN2</i>           | 19  | 523,867    | 1,533,360  | rs10422209                         | 19:1,026,318  | 0.132 | $5.5 \times 10^{-9}$  | upstream      | 0.970                | 0.993             |
| <i>APOE</i>           | 19  | 44,892,254 | 46,313,830 | rs429358                           | 19:45,411,941 | 0.118 | $3.3 \times 10^{-46}$ | missense      | 1.000                | 1.000             |
| <i>MMP9</i>           | 20  | 44,114,991 | 45,160,699 | rs142450006                        | 20:44,614,991 | 0.132 | $1.4 \times 10^{-11}$ | intergenic    | 1.000                | 0.999             |
| <i>C20orf85</i>       | 20  | 56,084,276 | 57,174,034 | rs117739907                        | 20:56,652,781 | 0.062 | $7.8 \times 10^{-18}$ | intergenic    | 1.000                | 1.000             |
| <i>SYN3/TIMP3</i>     | 22  | 32,546,536 | 33,613,375 | rs5754227                          | 22:33,105,817 | 0.123 | $2.0 \times 10^{-27}$ | intronic      | 1.000                | 1.000             |
| <i>SLC16A8</i>        | 22  | 37,795,271 | 39,003,972 | rs8135665                          | 22:38,476,276 | 0.205 | $2.9 \times 10^{-12}$ | intronic      | 1.000                | 0.999             |

**Table S3:** AMD risk variants identified by bfGWAS in the 34 known loci, accounting for gene-based annotations.

| Signal number | Reside/Nearby Gene      | dbSNPID     | Chr:Position   | Anno          | MAF   | bfGWAS PP | Effect-size | P-value                  |
|---------------|-------------------------|-------------|----------------|---------------|-------|-----------|-------------|--------------------------|
| 1.1           | <i>CFH</i>              | rs800292    | 1:196,642,233  | missense      | 0.183 | 0.997     | -0.312      | $2.4 \times 10^{-319}$   |
| 1.2           | <i>CFH</i>              | rs10922094  | 1:196,661,505  | intronic      | 0.530 | 1.000     | -0.214      | $< 9.0 \times 10^{-321}$ |
| 1.3           | <i>CFHR1</i>            | rs605082    | 1:196,801,917  | downstream    | 0.353 | 0.518     | -0.092      | $7.5 \times 10^{-257}$   |
| 1.4           | <i>CFHR4</i>            | rs58175074  | 1:196,820,080  | intronic      | 0.158 | 0.792     | -0.314      | $< 9.0 \times 10^{-321}$ |
| 1.5           | <i>CFHR4</i>            | rs149032610 | 1:196,857,150  | 5'-UTR        | 0.015 | 1.000     | 0.195       | $6.6 \times 10^{-38}$    |
| 1.6           | <i>CFHR4</i>            | rs10494745  | 1:196,887,457  | missense      | 0.134 | 0.526     | 0.092       | $7.4 \times 10^{-137}$   |
| 1.7           | <i>CFHR2</i>            | rs138579109 | 1:196,923,955  | intronic      | 0.043 | 0.893     | 0.167       | $8.4 \times 10^{-85}$    |
| 1.8           | <i>CFHR5</i>            | rs35662416  | 1:196,967,354  | missense      | 0.022 | 0.889     | -0.122      | $5.8 \times 10^{-6}$     |
| 2             | <i>COL4A3</i>           | rs11884770  | 2:228,086,920  | intronic      | 0.731 | 0.269     | 0.052       | $5.6 \times 10^{-9}$     |
| 3             | <i>ADAMTS9-AS2</i>      | rs7428936   | 3:64,710,850   | intronic      | 0.448 | 0.167     | -0.061      | $1.5 \times 10^{-15}$    |
| 4             | <i>COL8A1</i>           | rs140647181 | 3:99,180,668   | intergenic    | 0.019 | 0.687     | 0.224       | $54 \times 10^{-13}$     |
| 5             | <i>CFI</i>              | rs10033900  | 4:110,659,067  | downstream    | 0.506 | 0.999     | -0.067      | $7.2 \times 10^{-19}$    |
| 6             | <i>C9</i>               | rs34882957  | 5:39,331,894   | missense      | 0.012 | 0.998     | 0.278       | $4.0 \times 10^{-16}$    |
| 7             | <i>PRLR/SPEF2</i>       | rs114092250 | 5:35,494,448   | intergenic    | 0.019 | 0.403     | -0.174      | $2.5 \times 10^{-9}$     |
| 8.1           | <i>C2/CFB</i>           | rs4151667   | 6:31,914,024   | missense      | 0.036 | 0.917     | -0.279      | $1.4 \times 10^{-44}$    |
| 8.2           | <i>SKIV2L/NELFE</i>     | rs115270436 | 6:31,928,306   | missense      | 0.071 | 0.633     | -0.321      | $2.8 \times 10^{-99}$    |
| 8.3           | <i>HLA-DQB1</i>         | rs3891176   | 6:32,634,318   | missense      | 0.159 | 0.726     | 0.153       | $1.2 \times 10^{-11}$    |
| 9             | <i>VEGFA</i>            | rs943080    | 6:43,826,627   | intergenic    | 0.518 | 0.435     | 0.063       | $2.0 \times 10^{-16}$    |
| 10            | <i>KMT2E/SRPK2</i>      | rs1142      | 7:104,756,326  | downstream    | 0.357 | 0.125     | 0.052       | $1.5 \times 10^{-10}$    |
| 11            | <i>PILRB</i>            | rs35986051  | 7:99,956,439   | missense      | 0.139 | 0.193     | 0.075       | $4.0 \times 10^{-10}$    |
| 12            | <i>TNFRSF10A</i>        | rs79037040  | 8:23,082,971   | nc-transcript | 0.534 | 0.996     | 0.053       | $2.9 \times 10^{-12}$    |
| 13            | <i>MIR6130/RORB</i>     | rs10781182  | 9:76,617,720   | intergenic    | 0.684 | 0.070     | -0.052      | $3.0 \times 10^{-10}$    |
| 14            | <i>TRPM3</i>            | rs71507014  | 9:73,438,605   | intronic      | 0.584 | 0.822     | -0.046      | $3.2 \times 10^{-9}$     |
| 15            | <i>TGFBR1</i>           | rs10819635  | 9:101,864,510  | upstream      | 0.186 | 0.137     | -0.066      | $2.4 \times 10^{-11}$    |
| 16            | <i>ABCA1</i>            | rs2740488   | 9:107,661,742  | intronic      | 0.266 | 0.756     | -0.053      | $1.7 \times 10^{-9}$     |
| 17            | <i>ARHGAP21</i>         | rs12357257  | 10:24,999,593  | intronic      | 0.232 | 0.318     | 0.053       | $4.3 \times 10^{-9}$     |
| 18            | <i>ARMS2</i>            | rs10490924  | 10:124,214,448 | missense      | 0.316 | 0.996     | 0.474       | $< 9.0 \times 10^{-321}$ |
| 19            | <i>RDH5/CD63</i>        | rs3138142   | 12:56,115,585  | coding-syn    | 0.213 | 0.706     | 0.074       | $6.1 \times 10^{-10}$    |
| 20            | <i>MAPKAPK5</i>         | rs61941287  | 12:112,330,305 | intronic      | 0.019 | 0.309     | 0.191       | $1.2 \times 10^{-10}$    |
| 21            | <i>B3GLCT</i>           | rs9564692   | 13:31,821,240  | splice        | 0.288 | 0.942     | -0.056      | $3.2 \times 10^{-11}$    |
| 22            | <i>RAD51B</i>           | rs2842339   | 14:68,986,999  | intronic      | 0.899 | 0.243     | -0.082      | $3.1 \times 10^{-7}$     |
| 23            | <i>ALDH1A2</i>          | rs2414577   | 15:58,680,638  | intronic      | 0.366 | 0.501     | -0.067      | $4.8 \times 10^{-17}$    |
| 24            | <i>CETP</i>             | rs1532625   | 16:57,005,301  | splice        | 0.448 | 0.358     | 0.044       | $7.9 \times 10^{-19}$    |
| 25            | <i>CTRB2</i>            | rs72802342  | 16:75,234,872  | downstream    | 0.360 | 0.297     | -0.114      | $2.8 \times 10^{-13}$    |
| 26            | <i>CTB-96E2.2/VTN</i>   | rs704       | 17:26,694,861  | missense      | 0.483 | 0.325     | 0.042       | $3.3 \times 10^{-8}$     |
| 27            | <i>NPLOC4/TSPAN10</i>   | rs6420484   | 17:79,612,397  | missense      | 0.622 | 0.402     | -0.055      | $4.0 \times 10^{-12}$    |
| 28.1          | <i>FUT6/NRTN</i>        | rs17855739  | 19:5,831,840   | missense      | 0.044 | 0.681     | -0.159      | $1.5 \times 10^{-16}$    |
| 28.2          | <i>C3/CTD-3128G10.7</i> | rs147859257 | 19:6,718,146   | missense      | 0.008 | 1.000     | 0.501       | $4.3 \times 10^{-31}$    |
| 28.3          | <i>C3/CTD-3128G10.7</i> | rs2230199   | 19:6,718,387   | missense      | 0.764 | 1.000     | -0.172      | $1.7 \times 10^{-77}$    |

| Signal number | Reside/Nearby Gene             | dbSNPID     | Chr:Position  | Anno       | MAF   | bfGWAS PP | Effect-size | P-value               |
|---------------|--------------------------------|-------------|---------------|------------|-------|-----------|-------------|-----------------------|
| 29.1          | <i>ABCA7</i>                   | rs3752237   | 19:1,047,161  | coding-syn | 0.644 | 0.544     | -0.065      | $6.7 \times 10^{-3}$  |
| 29.2          | <i>ABCA7</i>                   | rs12151021  | 19:1,050,874  | intronic   | 0.708 | 1.000     | 0.091       | $1.9 \times 10^{-5}$  |
| 30            | <i>APOE/TOMM40/CTB-129P6.7</i> | rs429358    | 19:45,411,941 | missense   | 0.118 | 1.000     | -0.173      | $3.3 \times 10^{-46}$ |
| 31            | <i>MMP9/RP11-465L10.10</i>     | rs2274755   | 20:44,639,692 | splice     | 0.138 | 0.435     | -0.073      | $5.4 \times 10^{-11}$ |
| 32            | <i>C20orf85</i>                | rs201459901 | 20:56,653,724 | intergenic | 0.063 | 0.078     | -0.135      | $7.9 \times 10^{-18}$ |
| 33            | <i>SYN3</i>                    | rs5754227   | 22:33,105,817 | intronic   | 0.124 | 0.764     | -0.128      | $2.0 \times 10^{-27}$ |
| 34.1          | <i>SLC16A8/BAIAP2L2</i>        | rs4289289   | 22:38,477,342 | missense   | 0.485 | 0.824     | 0.056       | $1.1 \times 10^{-09}$ |
| 34.2          | <i>SLC16A8/BAIAP2L2</i>        | rs77968014  | 22:38,478,666 | splice     | 0.009 | 0.973     | 0.212       | $3.1 \times 10^{-6}$  |

Variants with Bayesian PPs >0.5 or the highest bfGWAS PPs in the loci are listed. Shown are reside/nearby genes, dbSNPIDs, positions, functional annotations, MAFs (unfolded, corresponding to the direction of effect-sizes), P-values, and Bayesian PPs/effect-sizes.

**Table S4:** AMD risk variants identified by fGWAS in the 34 known loci, accounting for gene-based annotations.

| Signal number | Reside/Nearby Gene     | dbSNPID     | Chr:Position   | Anno          | MAF   | fGWAS PP | P-value                  |
|---------------|------------------------|-------------|----------------|---------------|-------|----------|--------------------------|
| 1             | <i>CFH</i>             | rs10922109  | 1:196,704,632  | intronic      | 0.329 | 0.802    | $< 9.0 \times 10^{-321}$ |
| 2             | <i>COL4A3</i>          | rs11884770  | 2:228,086,920  | intronic      | 0.731 | 0.181    | $5.7 \times 10^{-9}$     |
| 3             | <i>ADAMTS9-AS2</i>     | rs62247658  | 3:64,715,155   | intronic      | 0.551 | 0.167    | $1.5 \times 10^{-15}$    |
| 4             | <i>COL8A1</i>          | rs140647181 | 3:99,180,668   | intergenic    | 0.019 | 0.999    | $5.4 \times 10^{-13}$    |
| 5             | <i>CFI</i>             | rs10033900  | 4:110,659,067  | downstream    | 0.506 | 0.996    | $7.2 \times 10^{-19}$    |
| 6             | <i>C9</i>              | rs34882957  | 5:39,331,894   | missense      | 0.012 | 0.900    | $4.0 \times 10^{-16}$    |
| 7             | <i>PRLR/SPEF2</i>      | rs114092250 | 5:35,494,448   | intergenic    | 0.019 | 0.626    | $2.5 \times 10^{-9}$     |
| 8             | <i>NELFE/SKIV2L</i>    | rs116503776 | 6:31,930,462   | intronic      | 0.120 | 0.912    | $2.1 \times 10^{-114}$   |
| 9             | <i>VEGFA</i>           | rs943080    | 6:43,826,627   | intergenic    | 0.518 | 0.437    | $2.0 \times 10^{-16}$    |
| 10            | <i>KMT2E/SRPK2</i>     | rs1142      | 7:104,756,326  | downstream    | 0.357 | 0.182    | $1.5 \times 10^{-10}$    |
| 11            | <i>PILRB</i>           | rs72615157  | 7:99,956,444   | missense      | 0.139 | 0.118    | $4.0 \times 10^{-10}$    |
| 12            | <i>TNFRSF10A</i>       | rs79037040  | 8:23,082,971   | nc-transcript | 0.534 | 0.996    | $2.9 \times 10^{-12}$    |
| 13            | <i>MIR6130/RORB</i>    | rs10781180  | 9:76,615,662   | intergenic    | 0.683 | 0.068    | $3.0 \times 10^{-10}$    |
| 14            | <i>TRPM3</i>           | rs71507014  | 9:73,438,605   | intronic      | 0.584 | 0.860    | $3.2 \times 10^{-9}$     |
| 15            | <i>TGFBR1</i>          | rs10819635  | 9:101,864,510  | upstream      | 0.186 | 0.188    | $2.4 \times 10^{-11}$    |
| 16            | <i>ABCA1</i>           | rs2740488   | 9:107,661,742  | intronic      | 0.266 | 0.760    | $1.7 \times 10^{-9}$     |
| 17            | <i>ARHGAP21</i>        | rs12357257  | 10:24,999,593  | intronic      | 0.232 | 0.280    | $4.3 \times 10^{-9}$     |
| 18            | <i>ARMS2</i>           | rs10490924  | 10:124,214,448 | missense      | 0.316 | 0.626    | $< 9.0 \times 10^{-321}$ |
| 19            | <i>RDH5/CD63</i>       | rs3138142   | 12:56,115,585  | coding-syn    | 0.213 | 0.847    | $6.1 \times 10^{-10}$    |
| 20            | <i>MAPKAPK5</i>        | rs61941287  | 12:112,330,305 | intronic      | 0.019 | 0.503    | $1.2 \times 10^{-10}$    |
| 21            | <i>B3GALTL</i>         | rs9564692   | 13:31,821,240  | splice        | 0.288 | 0.889    | $3.2 \times 10^{-11}$    |
| 22            | <i>RAD51B</i>          | rs1956526   | 14:68,799,787  | intronic      | 0.650 | 0.039    | $1.0 \times 10^{-11}$    |
| 23            | <i>ALDH1A2</i>         | rs2414577   | 15:58,680,638  | intronic      | 0.366 | 0.495    | $4.8 \times 10^{-17}$    |
| 24            | <i>CETP</i>            | rs5817082   | 16:56,997,349  | intronic      | 0.248 | 0.193    | $1.7 \times 10^{-21}$    |
| 25            | <i>BCAR1</i>           | rs72802395  | 16:75,286,484  | intronic      | 0.068 | 0.605    | $2.1 \times 10^{-11}$    |
| 26            | <i>POLDIP2/TNFAIP1</i> | rs13469     | 17:26,676,135  | coding-syn    | 0.523 | 0.168    | $5.1 \times 10^{-9}$     |
| 27            | <i>NPLOC4/TSPAN10</i>  | rs6420484   | 17:79,612,397  | missense      | 0.622 | 0.351    | $4.0 \times 10^{-12}$    |
| 28            | <i>C3</i>              | rs2230199   | 19:6,718,387   | missense      | 0.764 | 0.999    | $1.7 \times 10^{-77}$    |
| 29            | <i>CNN2</i>            | rs10422209  | 19:1,026,318   | upstream      | 0.132 | 0.229    | $5.2 \times 10^{-9}$     |
| 30            | <i>APOE/TOMM40</i>     | rs429358    | 19:45,411,941  | missense      | 0.118 | 1.000    | $3.3 \times 10^{-46}$    |
| 31            | <i>MMP9</i>            | rs2274755   | 20:44,639,692  | splice        | 0.138 | 0.194    | $5.4 \times 10^{-11}$    |
| 32            | <i>C20orf85</i>        | rs117739907 | 20:56,652,781  | intergenic    | 0.063 | 0.079    | $7.8 \times 10^{-18}$    |
| 33            | <i>SYN3</i>            | rs5754227   | 22:33,105,817  | intronic      | 0.124 | 0.781    | $2.0 \times 10^{-27}$    |
| 34            | <i>SLC16A8/PICK1</i>   | rs8135665   | 22:38,476,276  | intronic      | 0.205 | 0.596    | $2.9 \times 10^{-12}$    |

Variants with fGWAS PPs >0.5 or the highest fGWAS PPs in the loci are listed in this table. Shown are reside/nearby genes, dbSNPIDs, positions, functional annotations, MAFs (unfolded), fGWAS PPs, and P-values.

**Table S5:** Candidate AMD loci identified by bfGWAS, accounting for gene-based annotations.

| Locus | Reside gene     | dbSNPID            | Chr:Position   | Anno       | MAF   | P-value              | Regional-PP | bfGWAS PP | Effect-size |
|-------|-----------------|--------------------|----------------|------------|-------|----------------------|-------------|-----------|-------------|
| 1     | <i>PPIL3</i>    | <i>rs7562391</i>   | 2:201,736,166  | missense   | 0.127 | $4.8 \times 10^{-7}$ | 0.989       | 0.666     | -0.061      |
| 2     | <i>ZNRD1ASP</i> | <i>rs114318558</i> | 6:29,966,787   | downstream | 0.175 | $2.3 \times 10^{-7}$ | 0.993       | 0.135     | 0.058       |
| 3     | <i>CPN1</i>     | <i>rs61751507</i>  | 10:101,829,514 | missense   | 0.043 | $6.7 \times 10^{-8}$ | 0.994       | 0.598     | -0.106      |
| 4     | <i>ABHD2</i>    | <i>rs6496562</i>   | 15:89,736,558  | splice     | 0.417 | $8.4 \times 10^{-8}$ | 0.974       | 0.517     | 0.042       |
| 5     | <i>LBP</i>      | <i>rs2232613</i>   | 20:36,997,655  | missense   | 0.073 | $4.3 \times 10^{-7}$ | 0.955       | 0.881     | -0.079      |

Variants with the highest bfGWAS single variant PP in the candidate loci are listed in this table. Shown are reside genes, dbSNPIDs, positions, functional annotations, MAFs, P-values, Bayesian regional-PPs, and Bayesian PPs/effect-sizes.

**Table S6:** Candidate AMD loci identified by fGWAS, accounting for gene-based annotations.

| Locus | Reside gene  | dbSNPID            | Chr:Position   | Anno       | MAF   | P-value               | Regional-PP | fGWAS PP | Effect-size |
|-------|--------------|--------------------|----------------|------------|-------|-----------------------|-------------|----------|-------------|
| 1     | <i>PPIL3</i> | <i>rs7562391</i>   | 2:201,736,166  | missense   | 0.127 | $4.8 \times 10^{-7}$  | 0.986       | 0.475    | -0.061      |
| 2     | <i>HLA-K</i> | <i>rs116803720</i> | 6:29,889,989   | upstream   | 0.691 | $9.3 \times 10^{-10}$ | 0.998       | 0.101    | 0.056       |
| 3     | <i>CPN1</i>  | <i>rs61733667</i>  | 10:101,802,262 | coding-syn | 0.036 | $1.0 \times 10^{-7}$  | 0.994       | 0.254    | -0.118      |
| 4     | <i>ABHD2</i> | <i>rs6496562</i>   | 15:89,736,558  | splice     | 0.417 | $8.4 \times 10^{-8}$  | 0.978       | 0.405    | 0.042       |
| 5     | <i>LBP</i>   | <i>rs2232613</i>   | 20:36,997,655  | missense   | 0.073 | $4.3 \times 10^{-7}$  | 0.973       | 0.796    | -0.079      |

Variants with the highest fGWAS single variant PP in the candidate loci are listed in this table. Shown are reside genes, dbSNPIDs, positions, functional annotations, MAFs, P-values, fGWAS regional-PPs, fGWAS PPs, and Bayesian effect-sizes

**Table S7:** AMD risk variants by bfGWAS in the 34 known loci, accounting for summarized regulatory annotations.

| Signal number | Reside/nearby gene         | dbSNPID     | Chr:Position   | Anno       | MAF   | bfGWAS PP | Effect-size | P-value                  |
|---------------|----------------------------|-------------|----------------|------------|-------|-----------|-------------|--------------------------|
| 1.1           | <i>KCNT2</i>               | rs144520124 | 1:196,371,908  | DHS        | 0.005 | 1.000     | -0.383      | $1.9 \times 10^{-23}$    |
| 1.2           | <i>CFH</i>                 | rs74979069  | 1:196,588,463  | intergenic | 0.049 | 1.000     | 0.181       | $8.1 \times 10^{-92}$    |
| 1.3           | <i>CFH</i>                 | rs1089033   | 1:196,666,793  | intronic   | 0.412 | 1.000     | -0.117      | $< 9.0 \times 10^{-321}$ |
| 1.4           | <i>CFH</i>                 | rs2133143   | 1:196,718,099  | intergenic | 0.165 | 0.736     | -0.358      | $5.7 \times 10^{-246}$   |
| 1.5           | <i>CFH</i>                 | esv2672010  | 1:196,733,401  | others     | 0.157 | 1.000     | -0.283      | $3.3 \times 10^{-314}$   |
| 1.6           | <i>CFHR3</i>               | rs188826801 | 1:196,762,123  | intronic   | 0.014 | 0.993     | 0.176       | $1.2 \times 10^{-39}$    |
| 1.7           | <i>CFH</i>                 | rs79251424  | 1:196,782,416  | intergenic | 0.030 | 0.998     | 0.144       | $2.1 \times 10^{-6}$     |
| 1.8           | <i>RP4-608O15.3</i>        | rs146093852 | 1:196,811,860  | intergenic | 0.277 | 0.994     | -0.143      | $5.7 \times 10^{-254}$   |
| 2             | <i>COL4A3</i>              | rs11884770  | 2:228,086,920  | intronic   | 0.731 | 0.213     | 0.050       | $5.6 \times 10^{-9}$     |
| 3             | <i>ADAMTS9-AS2</i>         | rs11914351  | 3:64,723,441   | intronic   | 0.240 | 0.950     | -0.064      | $8.7 \times 10^{-7}$     |
| 4             | <i>COL8A1</i>              | rs140647181 | 3:99,180,668   | intergenic | 0.019 | 0.575     | 0.221       | $5.4 \times 10^{-13}$    |
| 5             | <i>CFI</i>                 | rs10033900  | 4:110,659,067  | intergenic | 0.506 | 0.994     | -0.067      | $7.2 \times 10^{-19}$    |
| 6             | <i>C9</i>                  | rs34882957  | 5:39,331,894   | coding     | 0.012 | 0.982     | 0.278       | $4.0 \times 10^{-9}$     |
| 7             | <i>PRLR/SPEF2</i>          | rs114092250 | 5:35,494,448   | intergenic | 0.019 | 0.346     | -0.172      | $2.5 \times 10^{-9}$     |
| 8.1           | <i>C2/CFB</i>              | rs4151667   | 6:31,914,024   | coding     | 0.035 | 0.579     | -0.284      | $1.3 \times 10^{-44}$    |
| 8.2           | <i>SKIV2/NELFE</i>         | rs115270436 | 6:31,928,306   | coding     | 0.071 | 0.566     | -0.321      | $2.8 \times 10^{-99}$    |
| 9             | <i>VEGFA</i>               | rs943080    | 6:43,826,627   | DHS        | 0.518 | 0.678     | 0.063       | $2.0 \times 10^{-16}$    |
| 10            | <i>LINC01004/KMT2E-AS1</i> | rs6950894   | 7:104,652,671  | promoter   | 0.511 | 0.063     | -0.047      | $9.8 \times 10^{-10}$    |
| 11            | <i>PILRB</i>               | rs7783159   | 7:100,017,454  | coding     | 0.203 | 0.115     | 0.059       | $5.1 \times 10^{-10}$    |
| 12            | <i>TNFRSF10A</i>           | rs79037040  | 8:23,082,971   | DHS        | 0.534 | 0.995     | 0.053       | $2.9 \times 10^{-12}$    |
| 13            | <i>MIR6130/RORB</i>        | rs10781180  | 9:76,615,662   | intergenic | 0.684 | 0.070     | -0.052      | $3.0 \times 10^{-10}$    |
| 14            | <i>TRPM3</i>               | rs71507014  | 9:73,438,605   | intronic   | 0.584 | 0.763     | -0.046      | $3.2 \times 10^{-9}$     |
| 15            | <i>TGFBR1</i>              | rs401186    | 9:101,925,077  | promoter   | 0.200 | 0.109     | -0.063      | $2.5 \times 10^{-11}$    |
| 16            | <i>ABCA1</i>               | rs2740488   | 9:107,661,742  | intronic   | 0.266 | 0.727     | -0.053      | $1.7 \times 10^{-9}$     |
| 17            | <i>ARHGAP21</i>            | rs12357257  | 10:24,999,593  | intronic   | 0.232 | 0.297     | 0.053       | $4.3 \times 10^{-9}$     |
| 18.1          | <i>ARMS2</i>               | rs7068411   | 10:124,202,878 | intergenic | 0.621 | 1.000     | 0.252       | $2.4 \times 10^{-212}$   |
| 18.2          | <i>ARMS2</i>               | rs7898343   | 10:124,212,887 | promoter   | 0.083 | 0.868     | -0.311      | $2.0 \times 10^{-51}$    |
| 18.3          | <i>ARMS2</i>               | rs10490923  | 10:124,214,251 | coding     | 0.109 | 0.962     | -0.272      | $1.7 \times 10^{-53}$    |
| 18.4          | <i>ARMS2</i>               | rs2736911   | 10:124,214,355 | coding     | 0.137 | 0.781     | -0.350      | $1.8 \times 10^{-53}$    |
| 18.5          | <i>HTRA1</i>               | rs2672601   | 10:124,220,023 | promoter   | 0.136 | 0.524     | -0.321      | $4.8 \times 10^{-53}$    |
| 18.6          | <i>HTRA1</i>               | rs74895474  | 10:124,230,397 | intronic   | 0.094 | 1.000     | -0.199      | $1.3 \times 10^{-42}$    |
| 18.7          | <i>HTRA1</i>               | rs12252027  | 10:124,234,988 | intronic   | 0.099 | 1.000     | -0.189      | $1.4 \times 10^{-51}$    |
| 18.8          | <i>HTRA1</i>               | rs2672589   | 10:124,234988  | DHS        | 0.653 | 1.000     | 0.220       | $8.9 \times 10^{-180}$   |
| 19            | <i>RDH5/CD63</i>           | rs143673140 | 12:56,514,414  | coding     | 0.009 | 0.001     | -0.096      | $1.3 \times 10^{-2}$     |
| 20            | <i>MAPKAPK5</i>            | rs61941287  | 12:112,330,305 | intronic   | 0.019 | 0.318     | 0.199       | $1.2 \times 10^{-10}$    |
| 21            | <i>B3GALTL</i>             | rs9564692   | 13:31,821,240  | DHS        | 0.288 | 0.429     | -0.056      | $3.2 \times 10^{-11}$    |
| 22            | <i>RAD51B</i>              | rs2842344   | 14:68,976,971  | DHS        | 0.899 | 0.215     | -0.082      | $3.7 \times 10^{-7}$     |
| 23            | <i>ALDH1A2</i>             | rs2414577   | 15:58,680,638  | DHS        | 0.366 | 0.508     | -0.067      | $1.5 \times 10^{-9}$     |
| 24            | <i>CETP</i>                | rs5883      | 16:57,007,353  | promoter   | 0.060 | 0.415     | 0.085       | $1.4 \times 10^{-20}$    |



| Signal number | Reside/nearby gene         | dbSNPID     | Chr:Position  | Anno     | MAF   | bfGWAS PP | Effect-size | P-value               |
|---------------|----------------------------|-------------|---------------|----------|-------|-----------|-------------|-----------------------|
| 25            | <i>CTRB2</i>               | rs55993634  | 16:75,236,763 | promoter | 0.082 | 0.321     | -0.104      | $4.6 \times 10^{-5}$  |
| 26            | <i>POLDIP2/TNFAIP1</i>     | rs13469     | 17:26,676,135 | coding   | 0.524 | 0.280     | 0.044       | $5.2 \times 10^{-9}$  |
| 27            | <i>NPLOC4/TSPAN10</i>      | rs9894429   | 17:79,596,811 | coding   | 0.441 | 0.261     | -0.045      | $4.0 \times 10^{-12}$ |
| 28.1          | <i>FUT6/NRTN</i>           | rs17855739  | 19:5,831,840  | coding   | 0.044 | 0.549     | -0.159      | $1.5 \times 10^{-16}$ |
| 28.2          | <i>C3/CTD-3128G10.7</i>    | rs147859257 | 19:6,718,146  | coding   | 0.008 | 1.000     | 0.501       | $4.3 \times 10^{-31}$ |
| 28.3          | <i>C3/CTD-3128G10.7</i>    | rs2230199   | 19:6,718,387  | coding   | 0.764 | 0.999     | -0.173      | $1.7 \times 10^{-77}$ |
| 29            | <i>ABCA7</i>               | rs3752241   | 19:1,053,524  | coding   | 0.160 | 0.268     | 0.055       | $3.2 \times 10^{-7}$  |
| 30            | <i>APOE(EXOC3L2/MARK4)</i> | rs429358    | 19:45,411,941 | coding   | 0.118 | 1.000     | -0.173      | $3.3 \times 10^{-46}$ |
| 31            | <i>MMP9/RP11-465L10.10</i> | rs17577     | 20:44,643,111 | coding   | 0.138 | 0.377     | -0.072      | $6.8 \times 10^{-11}$ |
| 32            | <i>RP13-379L11.1</i>       | rs7266392   | 20:56,651,542 | DHS      | 0.063 | 0.115     | -0.134      | $9.2 \times 10^{-18}$ |
| 33            | <i>SYN3</i>                | rs5754227   | 22:33,105,817 | intronic | 0.124 | 0.524     | -0.129      | $2.0 \times 10^{-27}$ |
| 34            | <i>SLC16A8/BAIAP2L2</i>    | rs77968014  | 22:38,478,666 | coding   | 0.009 | 0.842     | 0.207       | $3.1 \times 10^{-6}$  |

Variants with Bayesian PPs >0.5 or the highest bfGWAS PPs in the loci are listed (horizontal lines separate loci). Shown are reside/nearby genes, dbSNPIDs, positions, functional annotations, MAFs (unfolded, corresponding to the direction of effect-sizes), Bayesian PPs/effect-sizes, and P-values.

**Table S8:** AMD risk variants by fGWAS in the 34 known loci, accounting for summarized regulatory annotations.

| Signal number | Reside/nearby gene    | dbSNPID     | Chr:Position   | Anno          | MAF   | fGWAS PP | P-value                  |
|---------------|-----------------------|-------------|----------------|---------------|-------|----------|--------------------------|
| 1             | <i>CFH</i>            | rs1089033   | 1:196,666,793  | Intronic      | 0.412 | 0.522    | < 9.0×10 <sup>-321</sup> |
| 2             | <i>COL4A3</i>         | rs112103000 | 2:228,072,336  | intronic      | 0.163 | 0.135    | 2.0×10 <sup>-8</sup>     |
| 3             | <i>ADAMTS9-AS2</i>    | rs6793431   | 3:64,729,510   | intronic      | 0.891 | 0.001    | 6.4×10 <sup>-7</sup>     |
| 4             | <i>Intergenic</i>     | rs115407994 | 3:99,268,860   | intergenic    | 0.018 | 0.367    | 9.4×10 <sup>-13</sup>    |
| 5             | <i>CFI</i>            | rs10033900  | 4:110,659,067  | intergenic    | 0.506 | 0.996    | 7.2×10 <sup>-19</sup>    |
| 6             | <i>C9</i>             | rs34882957  | 5:39,331,894   | coding        | 0.012 | 0.757    | 4.0×10 <sup>-16</sup>    |
| 7             | <i>Intergenic</i>     | rs114092250 | 5:35,494,448   | intergenic    | 0.019 | 0.617    | 2.5×10 <sup>-9</sup>     |
| 8             | <i>NELFE/SKIV2L</i>   | rs116503776 | 6:31,930,462   | intronic      | 0.120 | 0.789    | 2.1×10 <sup>-114</sup>   |
| 9             | <i>Intergenic</i>     | rs943080    | 6:43,826,627   | DHS           | 0.518 | 0.557    | 2.0×10 <sup>-16</sup>    |
| 10            | <i>KMT2E/SRPK2</i>    | rs1142      | 7:104,756,326  | UTR           | 0.357 | 0.215    | 1.5×10 <sup>-10</sup>    |
| 11            | <i>ZCWPW1</i>         | rs7783159   | 7:100,017,454  | coding        | 0.203 | 0.047    | 5.1×10 <sup>-10</sup>    |
| 12            | <i>TNFRSF10A</i>      | rs79037040  | 8:23,082,971   | DHS           | 0.534 | 0.995    | 2.9×10 <sup>-12</sup>    |
| 13            | <i>Intergenic</i>     | rs10781180  | 9:76,615,662   | intergenic    | 0.683 | 0.067    | 3.0×10 <sup>-10</sup>    |
| 14            | <i>TRPM3</i>          | rs71507014  | 9:73,438,605   | intronic      | 0.584 | 0.837    | 3.2×10 <sup>-9</sup>     |
| 15            | <i>TGFBR1</i>         | rs10760667  | 9:101,864,607  | DHS           | 0.105 | 0.186    | 2.5×10 <sup>-11</sup>    |
| 16            | <i>ABCA1</i>          | rs2740488   | 9:107,661,742  | intronic      | 0.266 | 0.667    | 1.7×10 <sup>-9</sup>     |
| 17            | <i>ARHGAP21</i>       | rs142336524 | 10:24,879,784  | intronic      | 0.215 | 0.255    | 3.2×10 <sup>-8</sup>     |
| 18            | <i>ATE1-AS1</i>       | rs11594070  | 10:123,702,736 | nc-transcript | 0.334 | 0.003    | 1.7×10 <sup>-1</sup>     |
| 19            | <i>RDH5/CD63</i>      | rs3138136   | 12:56,117,570  | intronic      | 0.098 | 0.001    | 3.9×10 <sup>-4</sup>     |
| 20            | <i>MAPKAPK5</i>       | rs61941287  | 12:112,330,305 | nc-transcript | 0.019 | 0.153    | 1.2×10 <sup>-10</sup>    |
| 21            | <i>B3GALTL</i>        | rs9564692   | 13:31,821,240  | DHS           | 0.288 | 0.543    | 3.2×10 <sup>-11</sup>    |
| 22            | <i>RAD51B</i>         | rs11158728  | 14:68,762,205  | DHS           | 0.641 | 0.040    | 1.2×10 <sup>-11</sup>    |
| 23            | <i>ALDH1A2</i>        | rs2414577   | 15:58,680,638  | DHS           | 0.366 | 0.500    | 4.8×10 <sup>-17</sup>    |
| 24            | <i>CETP</i>           | rs7499892   | 16:57,006,590  | intronic      | 0.169 | 0.182    | 5.3×10 <sup>-21</sup>    |
| 25            | <i>BCAR1</i>          | rs72802395  | 16:75,286,484  | intronic      | 0.068 | 0.623    | 2.1×10 <sup>-11</sup>    |
| 26            | <i>POLDIP2/NFAIP1</i> | rs13469     | 17:26,676,135  | coding        | 0.523 | 0.134    | 5.1×10 <sup>-12</sup>    |
| 27            | <i>NPLOC4</i>         | rs8070929   | 17:79,530,993  | intronic      | 0.378 | 0.176    | 1.1×10 <sup>-12</sup>    |
| 28            | <i>C3</i>             | rs2230199   | 19:6,718,387   | coding        | 0.764 | 0.999    | 1.7×10 <sup>-77</sup>    |
| 29            | <i>CNN2/ABCA7</i>     | rs58369307  | 19:1,038,290   | UTR           | 0.109 | 0.207    | 8.5×10 <sup>-9</sup>     |
| 30            | <i>APOE/TOMM40</i>    | rs429358    | 19:45,411,941  | coding        | 0.118 | 1.000    | 3.3×10 <sup>-46</sup>    |
| 31            | <i>MMP9</i>           | rs17577     | 20:44,643,111  | coding        | 0.138 | 0.131    | 6.8×10 <sup>-11</sup>    |
| 32            | <i>RP13-379L11.1</i>  | rs141945849 | 20:56,650,604  | DHS           | 0.063 | 0.092    | 9.3×10 <sup>-18</sup>    |
| 33            | <i>SYN3</i>           | rs5754227   | 22:33,105,817  | intronic      | 0.124 | 0.681    | 2.0×10 <sup>-27</sup>    |
| 34            | <i>SLC16A8/PICK1</i>  | rs8135665   | 22:38,476,276  | intronic      | 0.205 | 0.607    | 2.9×10 <sup>-12</sup>    |

Variants with fGWAS PPs >0.5 or the highest fGWAS PPs in the loci or are listed (horizontal lines separate loci). Shown are reside/nearby genes, dbSNPIDs, positions, annotations, MAFs (unfolded, corresponding to the direction of effect-sizes), fGWAS PPs, and P-values.

**Table S9:** Candidate AMD loci identified by bfGWAS, accounting for summarized regulatory annotations.

| Locus | Reside gene      | dbSNPID            | Chr:Position   | Anno       | MAF   | P-value              | Regional-PP | bfGWAS PP | Effect-size |
|-------|------------------|--------------------|----------------|------------|-------|----------------------|-------------|-----------|-------------|
| 1     | <i>PPIL3</i>     | <i>rs7562391</i>   | 2:201,736,166  | coding     | 0.127 | $4.8 \times 10^{-7}$ | 0.967       | 0.475     | -0.061      |
| 2     | <i>ZNRD1-AS1</i> | <i>rs114357644</i> | 6:29,924,728   | intergenic | 0.669 | $2.3 \times 10^{-7}$ | 0.999       | 0.609     | 0.051       |
| 3     | <i>CPN1</i>      | <i>rs61733667</i>  | 10:101,829,514 | coding     | 0.036 | $1.0 \times 10^{-7}$ | 0.994       | 0.463     | -0.118      |

Variants with the highest bfGWAS PP in the candidate loci are listed in this table. Shown are reside genes, dbSNPIDs, positions, functional annotations, MAFs, P-values, Bayesian regional-PPs, and Bayesian PPs/effect-sizes.

**Table S10:** Candidate AMD loci identified by fGWAS, accounting for summarized regulatory annotations.

| Locus | Reside gene       | dbSNPID            | Chr:Position   | Anno       | MAF   | P-value               | Regional-PP | fGWAS PP | Effect-size |
|-------|-------------------|--------------------|----------------|------------|-------|-----------------------|-------------|----------|-------------|
| 1     | <i>PPIL3</i>      | <i>rs7562391</i>   | 2:201,736,166  | coding     | 0.127 | $4.8 \times 10^{-7}$  | 0.976       | 0.322    | -0.061      |
| 2     | <i>Intergenic</i> | <i>rs115754868</i> | 6:29,884,646   | intergenic | 0.653 | $9.6 \times 10^{-10}$ | 0.998       | 0.101    | 0.053       |
| 3     | <i>CPN1</i>       | <i>rs61733667</i>  | 10:101,802,262 | coding     | 0.036 | $1.0 \times 10^{-7}$  | 0.994       | 0.253    | -0.118      |
| 4     | <i>ABHD2</i>      | <i>rs8042649</i>   | 15:89,740,469  | UTR        | 0.417 | $1.2 \times 10^{-7}$  | 0.973       | 0.093    | 0.049       |

Variants with the highest fGWAS PP in the candidate loci are listed in this table. Shown are reside genes, dbSNPIDs, positions, functional annotations, MAFs, P-values, fGWAS regional-PPs, fGWAS PPs, and Bayesian effect-sizes.

**Table S11:** AMD risk variants by bfGWAS in the 34 known loci, accounting for chromatin states profiled with the epigenome of fetal thymus.

| Signal number | Reside/nearby gene     | dbSNPID            | Chr:Position   | Anno      | MAF   | bfGWAS PP | Effect-size | P-value                |
|---------------|------------------------|--------------------|----------------|-----------|-------|-----------|-------------|------------------------|
| 1.1           | <i>KCNT2</i>           | <i>rs144520124</i> | 1:196,371,908  | Quies     | 0.005 | 1.000     | -0.389      | $1.9 \times 10^{-23}$  |
| 1.2           | <i>KCNT2</i>           | <i>rs10754198</i>  | 1:196,573,505  | Quies     | 0.258 | 1.000     | -0.078      | $1.4 \times 10^{-228}$ |
| 1.3           | <i>Intergenic</i>      | <i>rs74979069</i>  | 1:196,588,463  | Quies     | 0.049 | 1.000     | 0.160       | $8.1 \times 10^{-92}$  |
| 1.4           | <i>CFH</i>             | <i>rs72734340</i>  | 1:196,681,376  | Quies     | 0.037 | 1.000     | -0.189      | $1.1 \times 10^{-1}$   |
| 1.5           | <i>Intergenic</i>      | <i>rs200467660</i> | 1:196,721,770  | Quies     | 0.161 | 1.000     | -0.405      | $1.1 \times 10^{-249}$ |
| 1.6           | <i>Intergenic</i>      | <i>rs113632891</i> | 1:196,731,186  | Quies     | 0.155 | 1.000     | -0.173      | $2.8 \times 10^{-296}$ |
| 1.7           | <i>ZNF675</i>          | <i>rs146093952</i> | 1:196,811,860  | Quies     | 0.277 | 1.000     | -0.207      | $2.2 \times 10^{-310}$ |
| 1.8           | <i>CFHR4</i>           | <i>rs76258418</i>  | 1:196,815,863  | Quies     | 0.130 | 1.000     | -0.199      | $2.7 \times 10^{-293}$ |
| 2             | <i>COL4A3</i>          | <i>rs112103000</i> | 2:228,072,336  | Quies     | 0.064 | 0.072     | 0.064       | $2.0 \times 10^{-8}$   |
| 3.1           | <i>ADAMTS9-AS2</i>     | <i>rs57305229</i>  | 3:64,720,574   | Quies     | 0.304 | 0.572     | -0.057      | $2.3 \times 10^{-5}$   |
| 3.2           | <i>ADAMTS9-AS2</i>     | <i>rs11914351</i>  | 3:64,723,441   | Quies     | 0.240 | 0.968     | -0.064      | $8.7 \times 10^{-7}$   |
| 4             | <i>Intergenic</i>      | <i>rs140647181</i> | 3:99,180,668   | Quies     | 0.019 | 0.703     | 0.222       | $5.3 \times 10^{-13}$  |
| 5             | <i>CFI</i>             | <i>rs10033900</i>  | 4:110,659,067  | Quies     | 0.506 | 0.999     | -0.067      | $7.2 \times 10^{-19}$  |
| 6             | <i>C9</i>              | <i>rs62358361</i>  | 5:39,327,888   | Quies     | 0.012 | 0.551     | 0.271       | $3.1 \times 10^{-16}$  |
| 7             | <i>Intergenic</i>      | <i>rs114092250</i> | 5:35,494,448   | Quies     | 0.019 | 0.213     | -0.171      | $2.5 \times 10^{-9}$   |
| 8.1           | <i>SKIV2L</i>          | <i>rs116503776</i> | 6:31,930,462   | Tx        | 0.120 | 1.000     | -0.307      | $2.1 \times 10^{-114}$ |
| 8.2           | <i>STK19/C4A</i>       | <i>rs144629244</i> | 6:31,946,792   | Enh       | 0.014 | 0.536     | 0.435       | $4.4 \times 10^{-7}$   |
| 8.3           | <i>PBX2/AGER/GPSM3</i> | <i>rs114254831</i> | 6:32,155,581   | EnhG      | 0.271 | 0.693     | 0.080       | $8.1 \times 10^{-13}$  |
| 9             | <i>Intergenic</i>      | <i>rs943080</i>    | 6:43,826,627   | Quies     | 0.518 | 0.422     | 0.063       | $2.0 \times 10^{-16}$  |
| 10            | <i>KMT2E/SRPK2</i>     | <i>rs1142</i>      | 7:104,756,326  | Tx        | 0.357 | 0.197     | 0.051       | $1.5 \times 10^{-10}$  |
| 11            | <i>NYAP1</i>           | <i>rs67040465</i>  | 7:100,083,078  | ReprPCWk  | 0.200 | 0.040     | 0.059       | $5.7 \times 10^{-10}$  |
| 12            | <i>TNFRSF10A</i>       | <i>rs79037040</i>  | 8:23,082,971   | BivFlnk   | 0.534 | 0.967     | 0.053       | $2.9 \times 10^{-12}$  |
| 13            | <i>Intergenic</i>      | <i>rs10781180</i>  | 9:76,615,662   | Quies     | 0.684 | 0.090     | -0.052      | $3.0 \times 10^{-10}$  |
| 14            | <i>TRPM3</i>           | <i>rs71507014</i>  | 9:73,438,605   | Quies     | 0.585 | 0.819     | -0.046      | $3.2 \times 10^{-9}$   |
| 15            | <i>TGFBR1</i>          | <i>rs10819635</i>  | 9:10,819,635   | TxWk      | 0.186 | 0.084     | -0.066      | $2.5 \times 10^{-11}$  |
| 16            | <i>ABCA1</i>           | <i>rs2740488</i>   | 9:107,661,742  | TxWk      | 0.266 | 0.759     | -0.053      | $1.7 \times 10^{-9}$   |
| 17            | <i>ARHGAP21</i>        | <i>rs12357257</i>  | 10:24,999,593  | Quies     | 0.232 | 0.308     | 0.053       | $4.3 \times 10^{-9}$   |
| 18.1          | <i>Intergenic</i>      | <i>rs7068411</i>   | 10:124,202,878 | Quies     | 0.621 | 1.000     | 0.198       | $2.4 \times 10^{-212}$ |
| 18.2          | <i>HTRA1</i>           | <i>rs2672595</i>   | 10:124,227,288 | ReprePCWk | 0.213 | 0.844     | -0.466      | $8.7 \times 10^{-111}$ |
| 18.3          | <i>HTRA1</i>           | <i>rs74895474</i>  | 10:124,230,397 | ReprePCWk | 0.094 | 0.578     | -0.181      | $1.3 \times 10^{-42}$  |
| 18.4          | <i>HTRA1</i>           | <i>rs4752699</i>   | 10:124,234,320 | ReprePCWk | 0.128 | 1.000     | -0.292      | $2.1 \times 10^{-51}$  |
| 18.5          | <i>HTRA1</i>           | <i>rs2672589</i>   | 10:124,234,988 | ReprePCWk | 0.653 | 1.000     | 0.274       | $8.9 \times 10^{-180}$ |
| 19            | <i>CDK2/PMEL</i>       | <i>rs2069389</i>   | 12:56,359,642  | Enh       | 0.044 | 0.001     | 0.042       | $5.3 \times 10^{-2}$   |
| 20            | <i>CUX2</i>            | <i>rs142641895</i> | 12:111,786,202 | Het       | 0.019 | 0.635     | 0.249       | $1.6 \times 10^{-9}$   |
| 21            | <i>B3GALTL</i>         | <i>rs9564692</i>   | 13:31,821,240  | Quies     | 0.288 | 0.411     | -0.056      | $3.2 \times 10^{-11}$  |
| 22            | <i>RAD51B</i>          | <i>rs2842339</i>   | 14:68,986,999  | TxWk      | 0.899 | 0.206     | -0.082      | $3.1 \times 10^{-7}$   |
| 23            | <i>ALDH1A2</i>         | <i>rs2414577</i>   | 15:58,680,638  | Quies     | 0.366 | 0.525     | -0.067      | $4.8 \times 10^{-17}$  |
| 24            | <i>CETP</i>            | <i>rs11076175</i>  | 16:57,006,378  | TxWk      | 0.67  | 0.203     | -0.072      | $5.0 \times 10^{-21}$  |

| Signal number | Reside/nearby gene            | dbSNPID            | Chr:Position  | Anno     | MAF   | bfGWAS PP | Effect-size | P-value                      |
|---------------|-------------------------------|--------------------|---------------|----------|-------|-----------|-------------|------------------------------|
| 25            | <i>CTRB2</i>                  | <i>rs72802342</i>  | 16:75,234,872 | Enh      | 0.074 | 0.478     | -0.114      | <b>2.8</b> $\times 10^{-13}$ |
| 26            | <i>SARM1/SLC46A1</i>          | <i>rs4795433</i>   | 17:26,716,821 | ReprPCWk | 0.524 | 0.138     | 0.045       | <b>1.6</b> $\times 10^{-9}$  |
| 27            | <i>NPLOC4</i>                 | <i>rs8070929</i>   | 17:79,530,993 | Tx       | 0.378 | 0.226     | 0.058       | <b>1.1</b> $\times 10^{-12}$ |
| 28.1          | <i>FUT6</i>                   | <i>rs12019136</i>  | 19:5,835,677  | Quies    | 0.042 | 0.639     | -0.160      | <b>3.7</b> $\times 10^{-17}$ |
| 28.2          | <i>C3</i>                     | <i>rs147859257</i> | 19:6,718,146  | Het      | 0.008 | 1.000     | 0.504       | <b>4.3</b> $\times 10^{-31}$ |
| 28.3          | <i>C3</i>                     | <i>rs2230199</i>   | 19:6,718,387  | Het      | 0.764 | 0.996     | -0.172      | <b>1.7</b> $\times 10^{-77}$ |
| 29            | <i>CNN2/ABCA7</i>             | <i>rs3087680</i>   | 19:1,038,289  | TxFlnk   | 0.109 | 0.208     | 0.072       | <b>8.6</b> $\times 10^{-9}$  |
| 30            | <i>APOE/TOMM40</i>            | <i>rs429358</i>    | 19:45,411,941 | ReprPCWk | 0.118 | 1.000     | -0.186      | <b>3.3</b> $\times 10^{-46}$ |
| 31            | <i>MMP9</i>                   | <i>rs142450006</i> | 20:44,614,991 | ReprPCWk | 0.132 | 0.251     | -0.079      | <b>1.4</b> $\times 10^{-11}$ |
| 32            | <i>Intergenic</i>             | <i>rs140611615</i> | 20:56,653,111 | Quies    | 0.062 | 0.080     | -0.135      | <b>8.2</b> $\times 10^{-18}$ |
| 33            | <i>SYN3</i>                   | <i>rs5754227</i>   | 22:33,105,817 | Quies    | 0.124 | 0.896     | -0.128      | $2.0 \times 10^{-27}$        |
| 34            | <i>SLC16A8/PICK1/BAIAP2L2</i> | <i>rs8135665</i>   | 22:38,476,276 | ReprPC   | 0.206 | 0.624     | 0.066       | $2.9 \times 10^{-12}$        |

Variants with Bayesian PPs >0.5 or the highest bfGWAS PPs in the loci are listed in this table. Shown are reside/nearby genes, dbSNPIDs, positions, annotations, MAFs (unfolded, corresponding to the direction of effect-sizes), P-values, and Bayesian PPs/effect-sizes.

**Table S12:** AMD risk variants by fGWAS in the 34 known loci, accounting for chromatin states profiled with the epigenome of fetal thymus.

| Signal number | Reside/Nearby Gene     | dbSNPID     | Chr:Position   | Anno     | MAF   | fGWAS PP | P-value                  |
|---------------|------------------------|-------------|----------------|----------|-------|----------|--------------------------|
| 1             | <i>CFH</i>             | rs1089033   | 1:196,666,793  | Quies    | 0.412 | 1.000    | $< 9.0 \times 10^{-321}$ |
| 2             | <i>COL4A3</i>          | rs11884770  | 2:228,086,920  | Quies    | 0.731 | 0.731    | $5.7 \times 10^{-9}$     |
| 3             | <i>ADAMTS9-AS2</i>     | rs66793786  | 3:64,707,880   | Quies    | 0.243 | 0.050    | $2.0 \times 10^{-7}$     |
| 4             | <i>COL8A1</i>          | rs140647181 | 3:99,180,668   | Quies    | 0.019 | 0.307    | $5.4 \times 10^{-13}$    |
| 5             | <i>CFI</i>             | rs10033900  | 4:110,659,067  | Quies    | 0.506 | 0.994    | $7.2 \times 10^{-19}$    |
| 6             | <i>C9</i>              | rs62358361  | 5:39,327,888   | Quies    | 0.012 | 0.559    | $3.1 \times 10^{-16}$    |
| 7             | <i>PRLR/SPEF2</i>      | rs114092250 | 5:35,494,448   | Quies    | 0.019 | 0.468    | $2.5 \times 10^{-9}$     |
| 8             | <i>NELFE/SKIV2L</i>    | rs116503776 | 6:31,930,462   | Tx       | 0.120 | 0.967    | $2.1 \times 10^{-114}$   |
| 9             | <i>VEGFA</i>           | rs943080    | 6:43,826,627   | Quies    | 0.518 | 0.437    | $2.0 \times 10^{-16}$    |
| 10            | <i>KMT2E/SRPK2</i>     | rs1142      | 7:104,756,326  | Tx       | 0.357 | 0.141    | $1.5 \times 10^{-10}$    |
| 11            | <i>ZKSCAN1</i>         | rs2406255   | 7:100,053,690  | EnhG     | 0.200 | 0.026    | $5.9 \times 10^{-10}$    |
| 12            | <i>TNFRSF10A</i>       | rs79037040  | 8:23,082,971   | BivFlnk  | 0.534 | 0.998    | $2.9 \times 10^{-12}$    |
| 13            | <i>Intergenic</i>      | rs10781180  | 9:76,615,662   | Quies    | 0.684 | 0.068    | $3.0 \times 10^{-10}$    |
| 14            | <i>TRPM3</i>           | rs71507014  | 9:73,438,605   | Quies    | 0.584 | 0.776    | $3.2 \times 10^{-9}$     |
| 15            | <i>TGFBR1</i>          | rs6478972   | 9:101,869,278  | Enh      | 0.200 | 0.103    | $3.5 \times 10^{-11}$    |
| 16            | <i>ABCA1</i>           | rs2740488   | 9:107,661,742  | TxWk     | 0.266 | 0.746    | $1.7 \times 10^{-9}$     |
| 17            | <i>ARHGAP21</i>        | rs12357257  | 10:24,999,593  | Quies    | 0.232 | 0.269    | $4.3 \times 10^{-9}$     |
| 18            | <i>ARMS2</i>           | rs2672599   | 10:124,211,875 | Quies    | 0.641 | 1.000    | $2.7 \times 10^{-263}$   |
| 19            | <i>RDH5/CD63</i>       | rs3138136   | 12:56,117,570  | EnhG     | 0.099 | 0.001    | $3.9 \times 10^{-4}$     |
| 20            | <i>MAPKAPK5</i>        | rs61941287  | 12:112,330,305 | Tx       | 0.019 | 0.205    | $1.2 \times 10^{-10}$    |
| 21            | <i>B3GALTL</i>         | rs9564692   | 13:31,821,240  | Quies    | 0.288 | 0.388    | $3.2 \times 10^{-11}$    |
| 22            | <i>RAD51B</i>          | rs11158728  | 14:68,762,205  | Enh      | 0.640 | 0.066    | $1.0 \times 10^{-11}$    |
| 23            | <i>ALDH1A2</i>         | rs2414577   | 15:58,680,638  | Quies    | 0.366 | 0.495    | $4.8 \times 10^{-17}$    |
| 24            | <i>CETP</i>            | rs5817082   | 16:56,997,349  | TxWk     | 0.248 | 0.254    | $1.7 \times 10^{-21}$    |
| 25            | <i>CTRB2</i>           | rs72802342  | 16:75,234,872  | Enh      | 0.073 | 0.656    | $2.8 \times 10^{-13}$    |
| 26            | <i>TNFAIP1/POLDIP2</i> | rs733914    | 17:26,671,196  | EnhG     | 0.526 | 0.156    | $3.5 \times 10^{-9}$     |
| 27            | <i>NPLOC4</i>          | rs8070929   | 17:79,530,993  | Tx       | 0.378 | 0.221    | $1.1 \times 10^{-12}$    |
| 28            | <i>C3</i>              | rs2230199   | 19:6,718,387   | Het      | 0.764 | 0.992    | $1.7 \times 10^{-77}$    |
| 29            | <i>CNN2/ABCA7</i>      | rs58369307  | 19:1,038,290   | TxFlnk   | 0.109 | 0.369    | $8.5 \times 10^{-9}$     |
| 30            | <i>APOE/TOMM40</i>     | rs429358    | 19:45,411,941  | ReprPCWk | 0.118 | 1.000    | $3.3 \times 10^{-46}$    |
| 31            | <i>MMP9</i>            | rs1888235   | 20:44,623,967  | Enh      | 0.133 | 0.281    | $1.4 \times 10^{-11}$    |
| 32            | <i>C20orf85</i>        | rs117739907 | 20:56,652,781  | Quies    | 0.062 | 0.079    | $7.8 \times 10^{-18}$    |
| 33            | <i>SYN3</i>            | rs5754227   | 22:33,105,817  | Quies    | 0.124 | 0.791    | $2.0 \times 10^{-27}$    |
| 34            | <i>SLC16A8/PICK1</i>   | rs8135665   | 22:38,476,276  | ReprPC   | 0.205 | 0.773    | $2.9 \times 10^{-12}$    |

Variants with either the highest fGWAS PP per locus or fGWAS PP > 0.5 are listed (horizontal lines separate loci). Shown are reside/nearby genes, dbSNPIDs, positions, functional annotations, MAFs (unfolded, corresponding to the direction of effect-sizes), fGWAS PPs, and P-values.

**Table S13:** Candidate AMD loci identified by bfGWAS, accounting for chromatin states profiled with the epigenome of fetal thymus.

| Locus | Reside gene  | dbSNPID            | Chr:Position   | Anno     | MAF   | P-value              | Regional-PP | bfGWAS PP | Effect-size |
|-------|--------------|--------------------|----------------|----------|-------|----------------------|-------------|-----------|-------------|
| 1     | <i>HLA-W</i> | <i>rs114357644</i> | 6:29,924,728   | TxWk     | 0.669 | $2.3 \times 10^{-7}$ | 0.988       | 0.877     | 0.051       |
| 2     | <i>CPN1</i>  | <i>rs111563092</i> | 10:101,808,993 | ReprPCWk | 0.045 | $7.2 \times 10^{-8}$ | 0.998       | 0.171     | -0.106      |

Variants with the highest bfGWAS PPs in the candidate loci are listed in this table. Shown are reside genes, dbSNPIDs, positions, functional annotations, MAFs, P-values, Bayesian regional-PPs, and Bayesian PPs/effect-sizes.

**Table S14:** Candidate AMD loci identified by fGWAS, accounting for chromatin states profiled with the epigenome of fetal thymus.

| Locus | Reside gene       | dbSNPID            | Chr:Position   | Anno  | MAF   | P-value               | Regional-PP | fGWAS PP | Effect-size |
|-------|-------------------|--------------------|----------------|-------|-------|-----------------------|-------------|----------|-------------|
| 1     | <i>PPIL3</i>      | <i>rs7562391</i>   | 2:201,736,166  | Tx    | 0.127 | $6.5 \times 10^{-8}$  | 0.969       | 0.088    | -0.061      |
| 2     | <i>Intergenic</i> | <i>rs140766203</i> | 6:29,883,869   | Quies | 0.652 | $8.5 \times 10^{-10}$ | 0.998       | 0.044    | 0.053       |
| 3     | <i>CPN1</i>       | <i>rs113582392</i> | 10:101,804,258 | Enh   | 0.045 | $1.4 \times 10^{-8}$  | 0.993       | 0.154    | -0.106      |
| 4     | <i>ABHD2</i>      | <i>rs4932480</i>   | 15:89,723,858  | EnhG  | 0.501 | $7.2 \times 10^{-8}$  | 0.971       | 0.138    | -0.043      |

Variants with the highest fGWAS PPs in the candidate loci are listed in this table. Shown are reside genes, dbSNPIDs, positions, functional annotations, MAFs, P-values, fGWAS regional-PPs, fGWAS PPs, and Bayesian effect-sizes.

**Table S15:** Haplotype analysis in locus C2/CFB/SKIV2L.

| Region        | Haplotype                              |                                   |                                     | Haplotype Frequency (%) |                      | P-value               | OR (95% CI)           |
|---------------|----------------------------------------|-----------------------------------|-------------------------------------|-------------------------|----------------------|-----------------------|-----------------------|
|               | SKIV2L intronic ( <i>rs116503776</i> ) | CFB missense ( <i>rs4151667</i> ) | CFB missense ( <i>rs115270436</i> ) | Cases                   | Controls             |                       |                       |
| C2/CFB/SKIV2L | 1                                      | 1                                 | 1                                   | $1.5 \times 10^{-3}$    | $4.2 \times 10^{-3}$ | $8.9 \times 10^{-11}$ | 0.364 (0.265, 0.501)  |
|               | 1                                      | 0                                 | 1                                   | 0.046                   | 0.085                | $1.5 \times 10^{-86}$ | 0.522 (0.490, 0.557)  |
|               | 1                                      | 1                                 | 0                                   | 0.023                   | 0.041                | $5.0 \times 10^{-36}$ | 0.561 (0.513, 0.613)  |
|               | 0                                      | 0                                 | 1                                   | $8.9 \times 10^{-4}$    | $1.5 \times 10^{-3}$ | 0.024                 | 0.586 (0.375, 0.917)  |
|               | 1                                      | 0                                 | 0                                   | 0.018                   | 0.017                | 0.092                 | 1.102 (0.983, 1.236)  |
|               | 0                                      | 0                                 | 0                                   | 0.909                   | 0.850                | -                     | Reference Haplotype   |
|               | 0                                      | 1                                 | 0                                   | $6.1 \times 10^{-5}$    | $2.8 \times 10^{-5}$ | 0.306                 | 1.840 (0.243, 13.938) |

Considered the haplotype consisting with the top significant intronic variant found by single variant test P-values (*rs116503776* with p-value= $2.1 \times 10^{-114}$ ), the top two significant missense variants (in the  $\pm 20$ KB region around *rs116503776*) found by bfGWAS (*rs4151667* with Bayesian PP=0.903, *rs115270436* with Bayesian PP= 0.638).

**Table S16:** Model comparison.

| Region (C2/CFB/SKIV2L)               | SKIV2L intronic ( <i>rs116503776</i> ) & PBX2 intronic ( <i>rs114254831</i> ) | CFB missense ( <i>rs4151667</i> ) & SKIV2L missense ( <i>rs115270436</i> ) | Differences (col2-col3) |
|--------------------------------------|-------------------------------------------------------------------------------|----------------------------------------------------------------------------|-------------------------|
| Akaike information criterion (AIC)   | 95857.36                                                                      | 95752.63                                                                   | 104.73                  |
| Bayesian information criterion (BIC) | 95891.1                                                                       | 95786.36                                                                   | 104.74                  |
| Log Likelihood                       | -47924.68                                                                     | -47872.31                                                                  | -52.37                  |

Compared the linear regression model with the top two independent significant variants (*rs116503776*, *rs114254831*) found by conditional analysis, versus the linear regression model with the top two significant variants (*rs4151667*, *rs115270436*) found by bfGWAS accounting for gene-based annotations.



## Supplemental References

- [1] Wellcome Trust Case Control Consortium. Genome-wide association study of 14,000 cases of seven common diseases and 3,000 shared controls. *Nature*, 447(7145):661–678, 06 2007.
- [2] A. P. Dempster, N. M. Laird, and D. B. Rubin. Maximum likelihood from incomplete data via the em algorithm. *Journal of the Royal Statistical Society. Series B (Methodological)*, 39(1):pp. 1–38, 1977.
- [3] Edgar C Fieller. Some problems in interval estimation. *Journal of the Royal Statistical Society. Series B (Methodological)*, pages 175–185, 1954.
- [4] Andrew Gelman and Donald B. Rubin. Inference from iterative simulation using multiple sequences. *Statistical Science*, 7(4):pp. 457–472, 1992.
- [5] Edward I. George and Robert E. McCulloch. Variable selection via gibbs sampling. *Journal of the American Statistical Association*, 88(423):881–889, 1993.
- [6] Yongtao Guan and Matthew Stephens. Bayesian variable selection regression for genome-wide association studies and other large-scale problems. *Ann. Appl. Stat.*, 5(3):1780–1815, 09 2011.
- [7] Xiang Zhou, Peter Carbonetto, and Matthew Stephens. Polygenic modeling with bayesian sparse linear mixed models. *PLoS Genet*, 9(2):e1003264, 02 2013.
